# Supplementary material for: Gene-vegetarianism interactions in calcium, testosterone, and eGFR identified in genome-wide analysis across 30 biomarkers
Source: bioRxiv or medRxiv preprint supplement (doi:10.1101/2022.10.21.22281358), 2023-02-06

S1

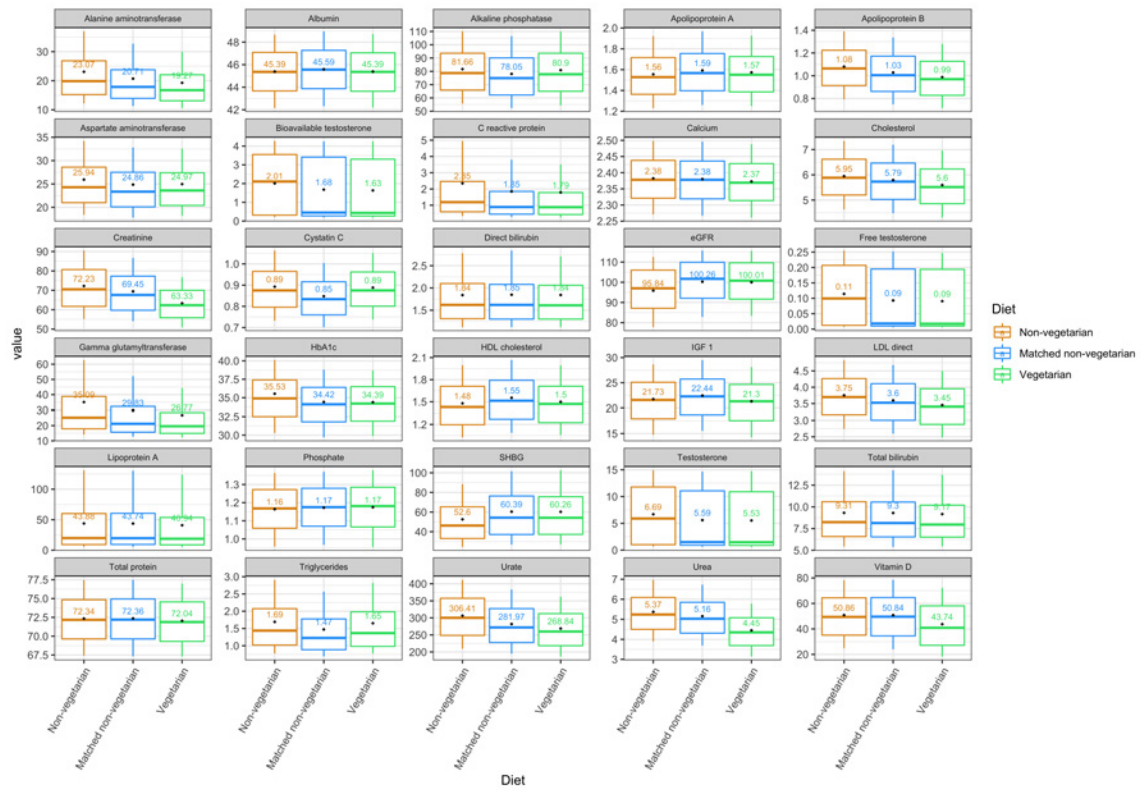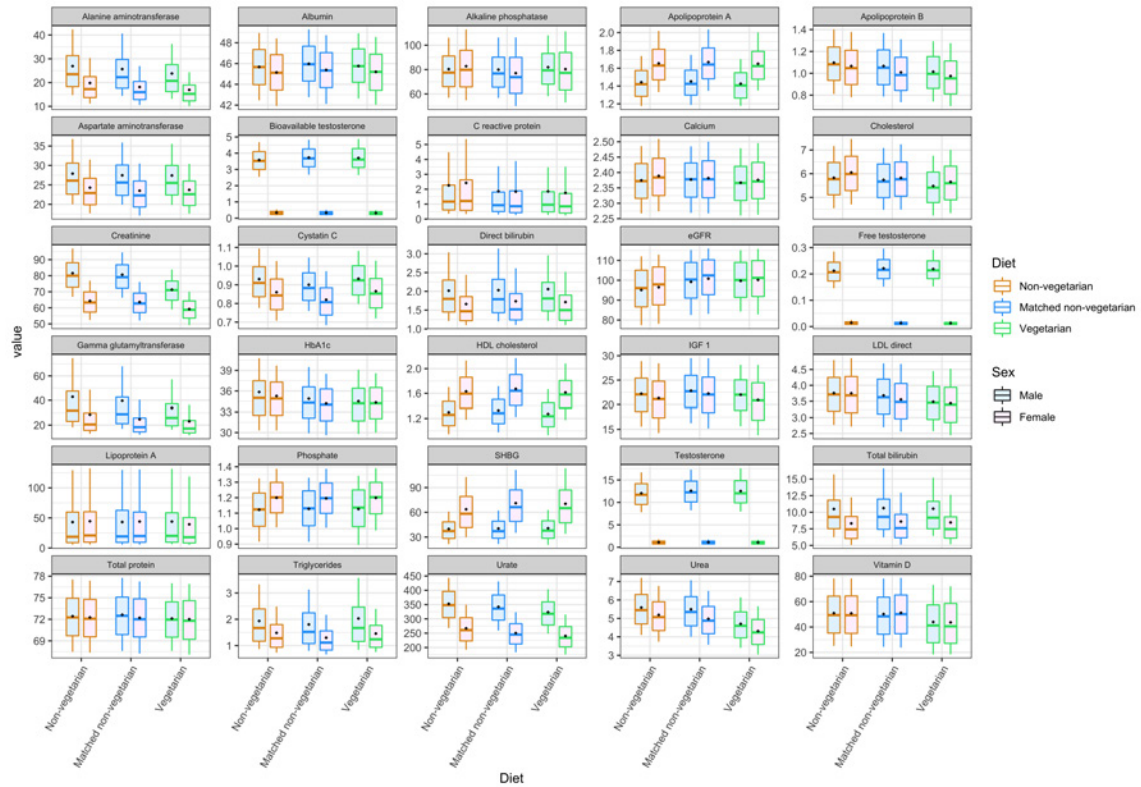

S2

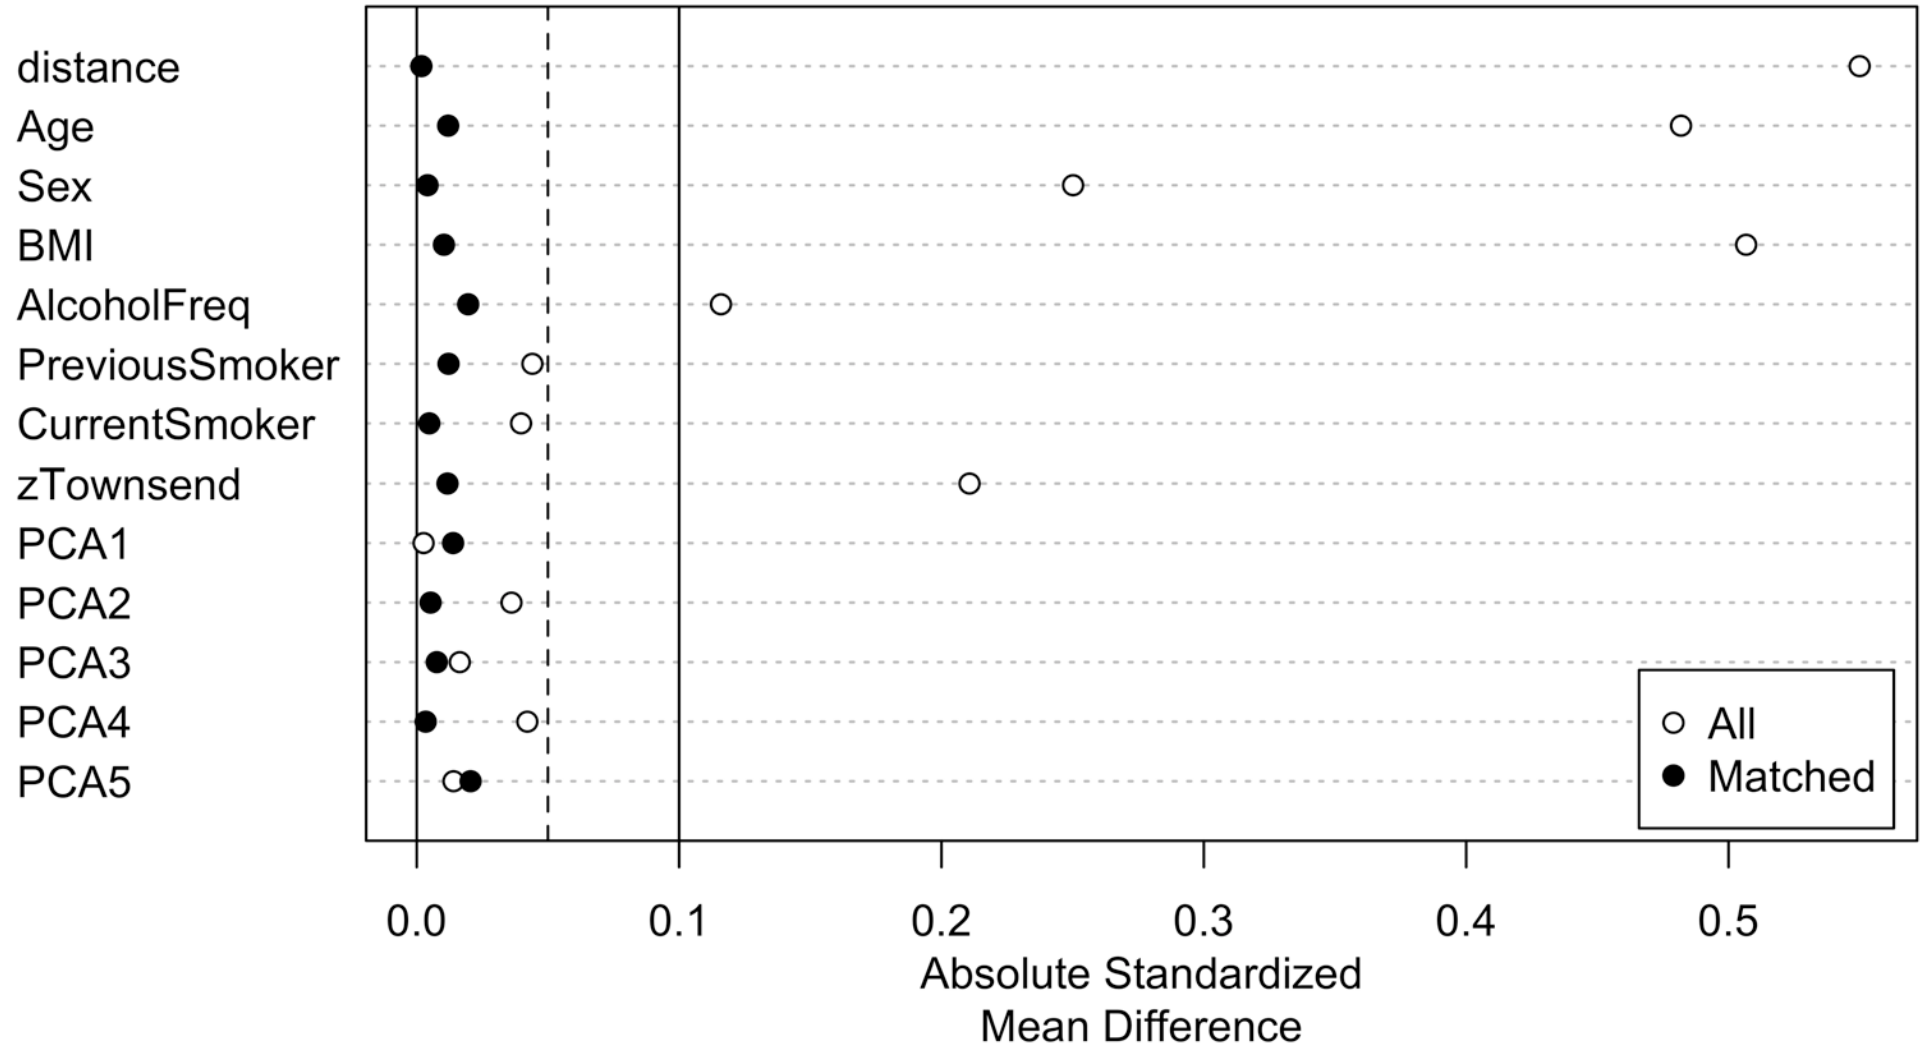

S3

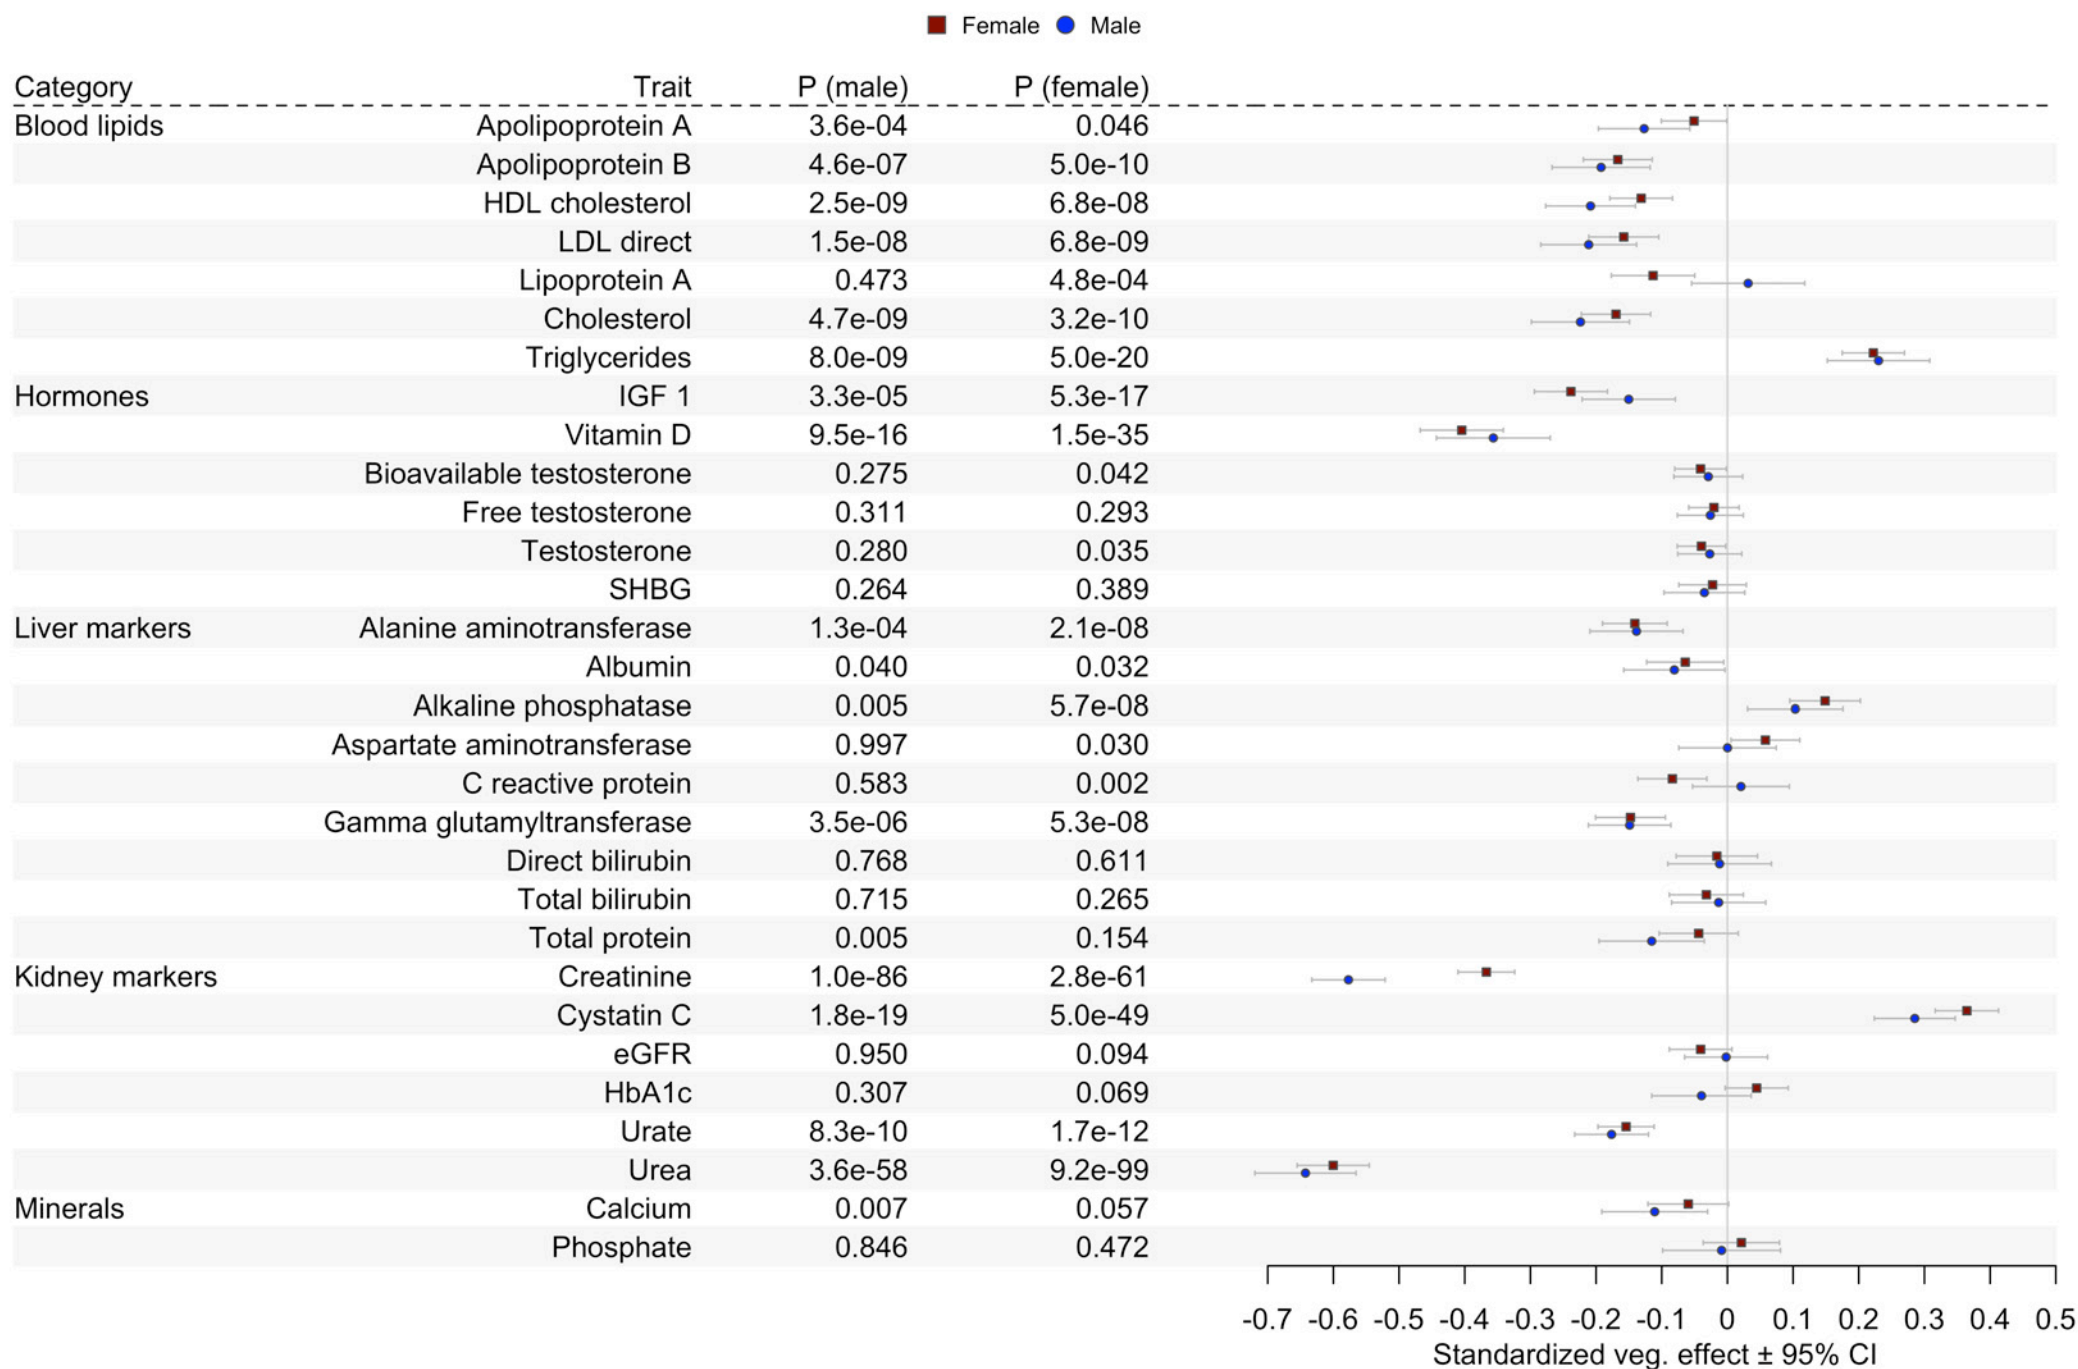

S4

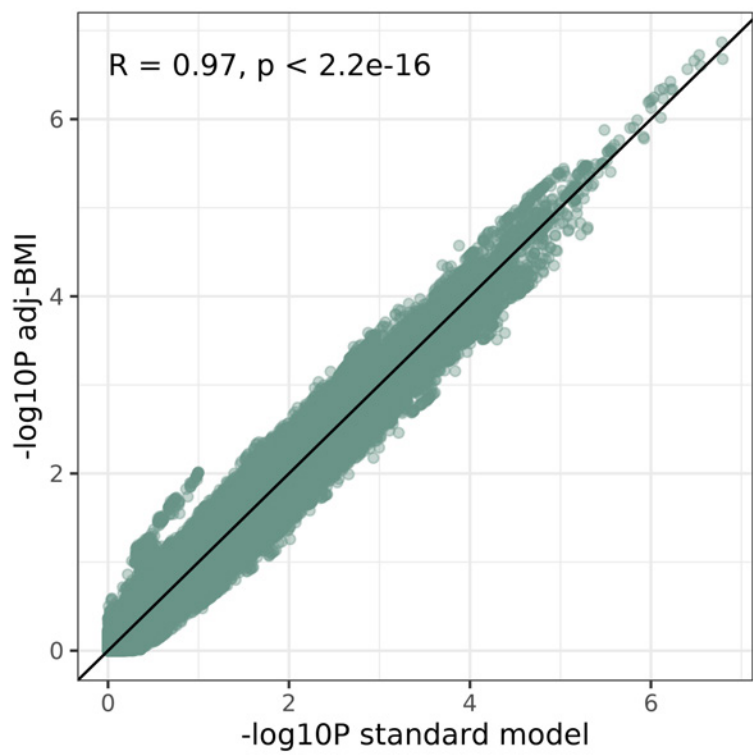



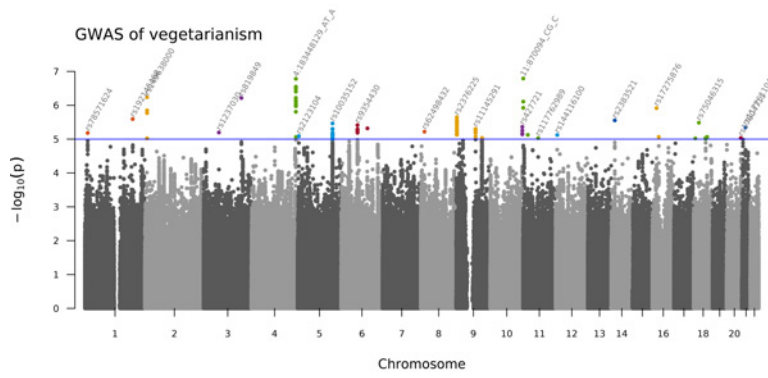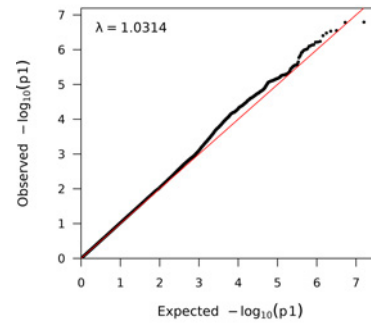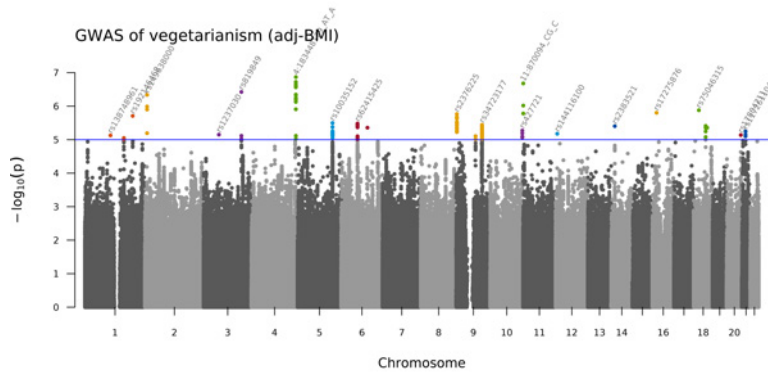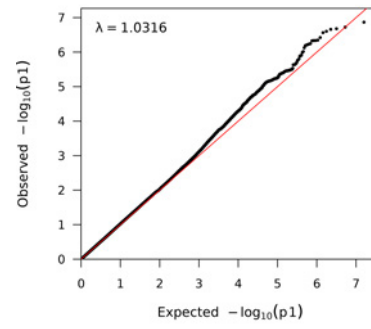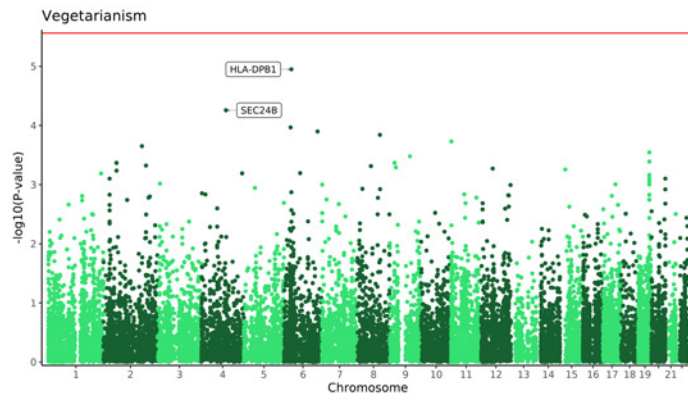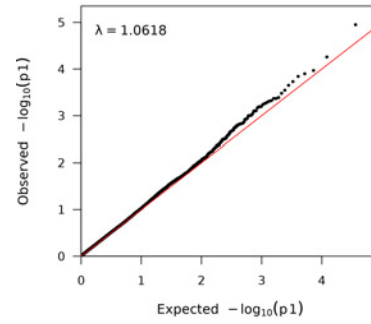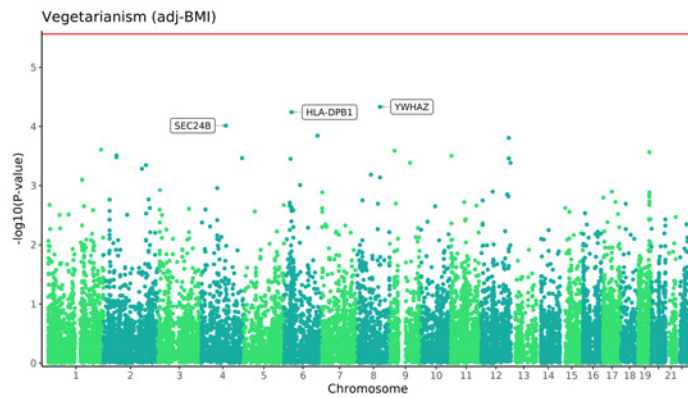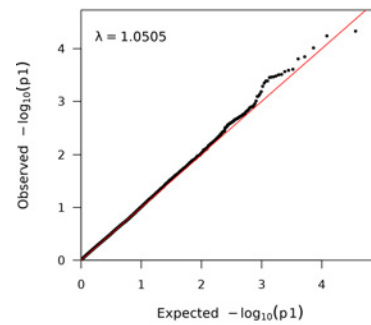

**S6**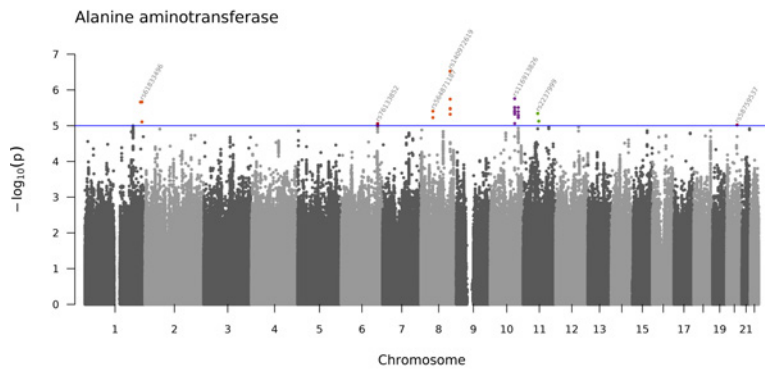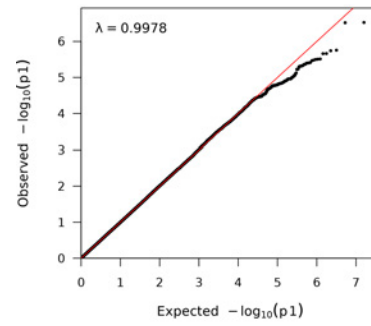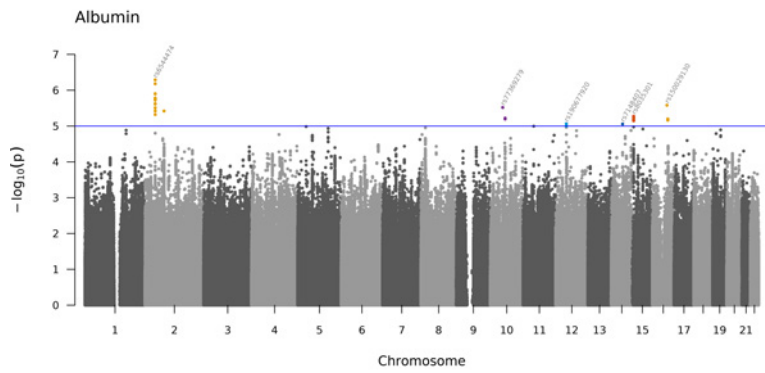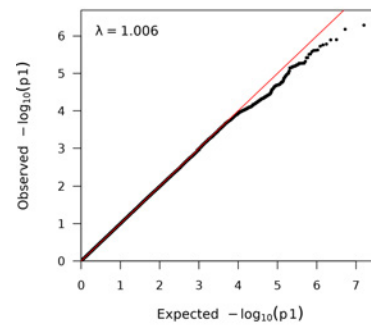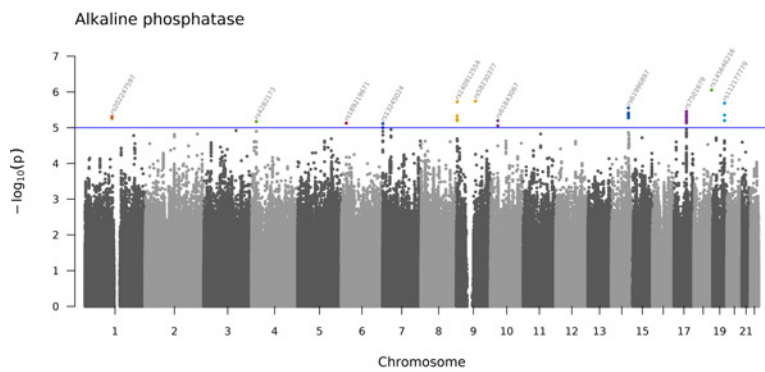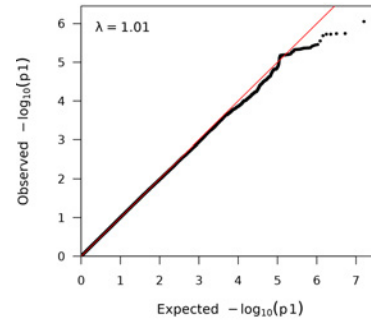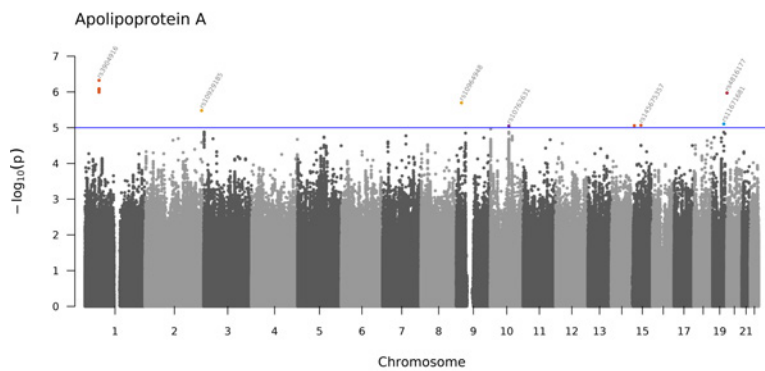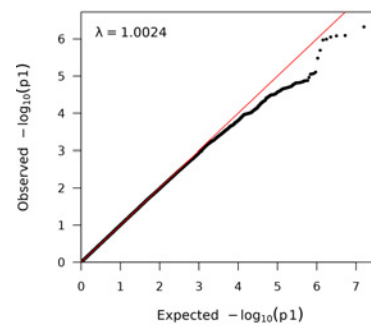

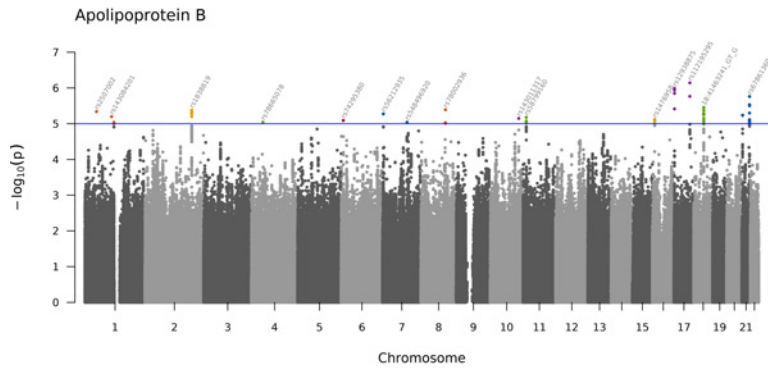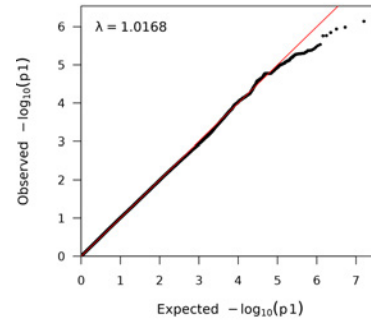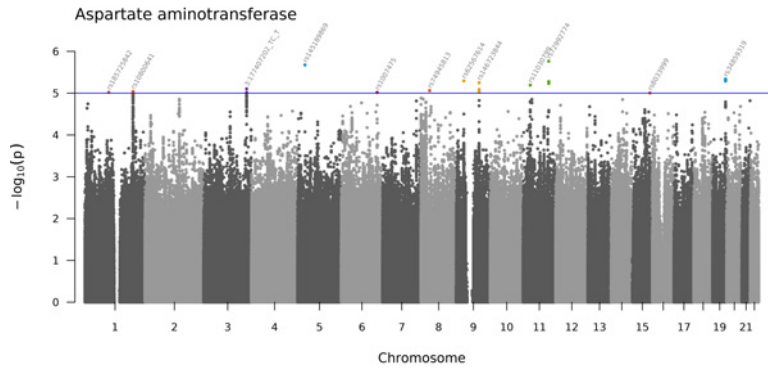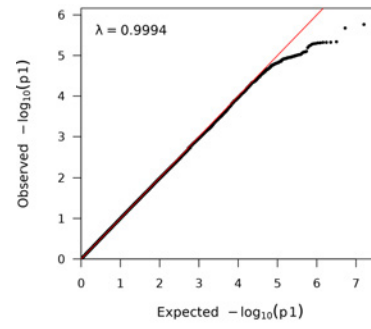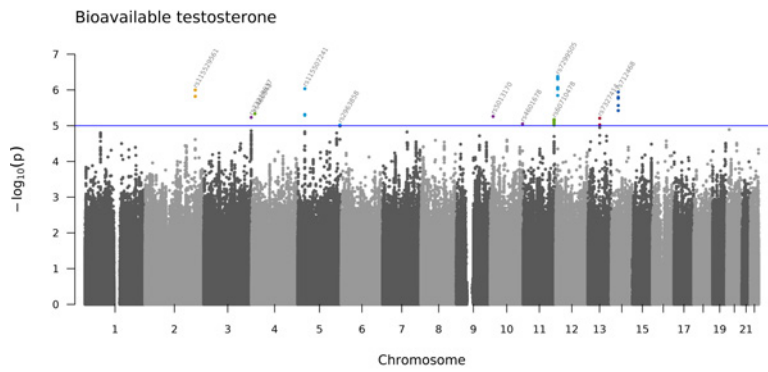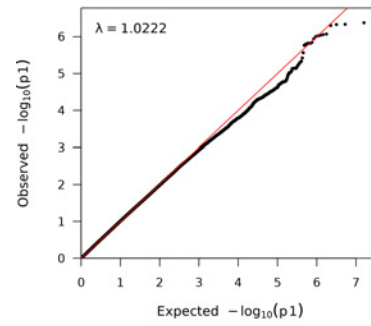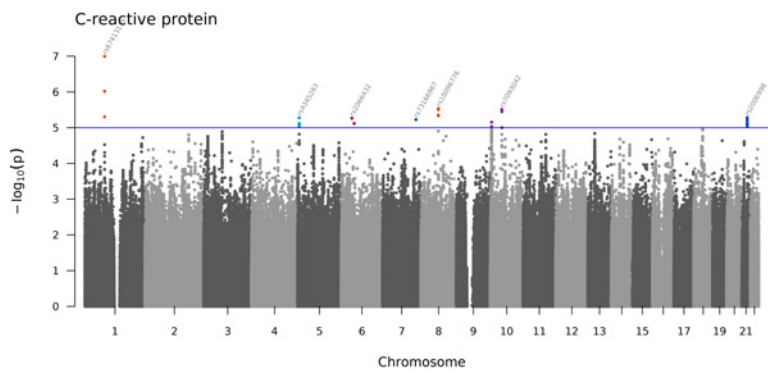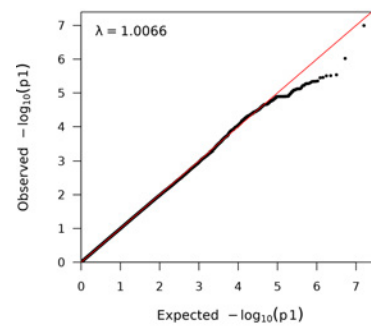

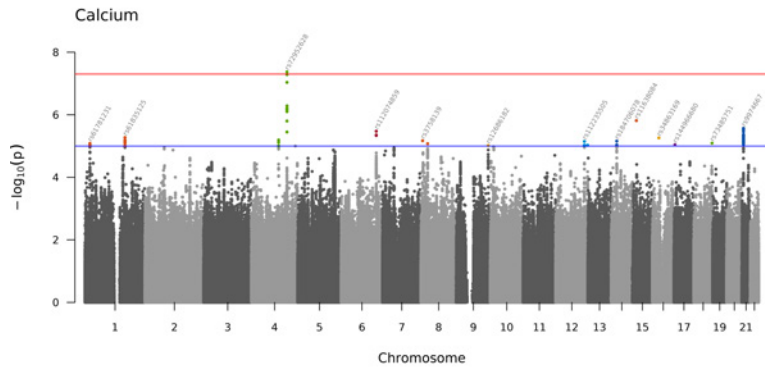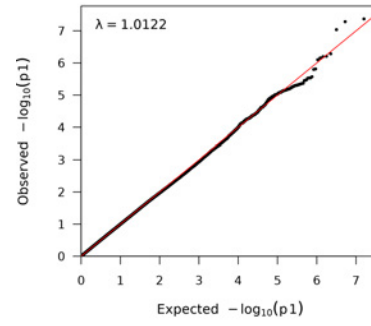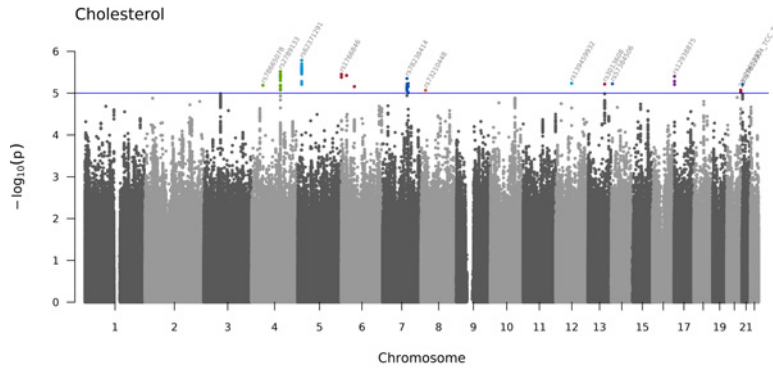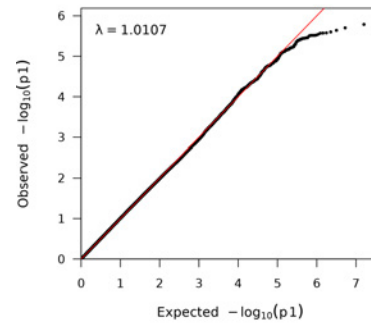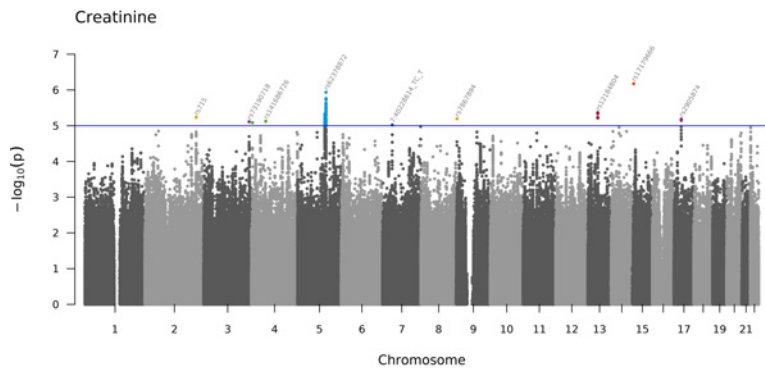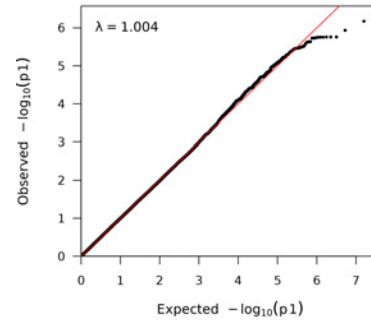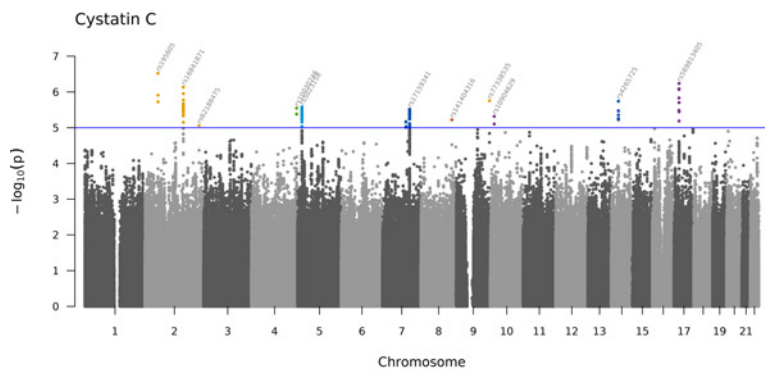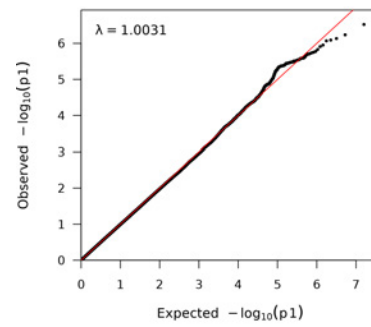

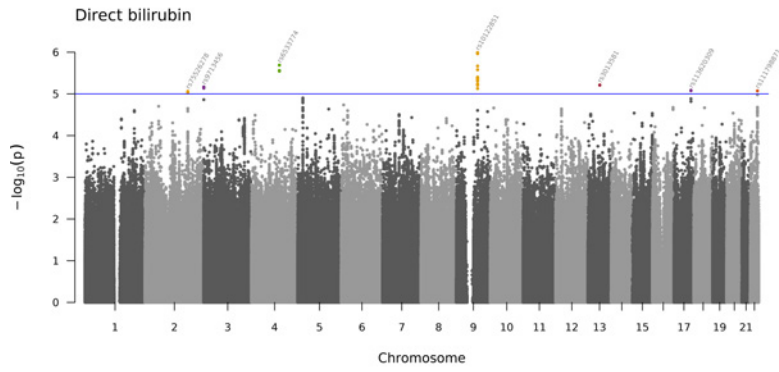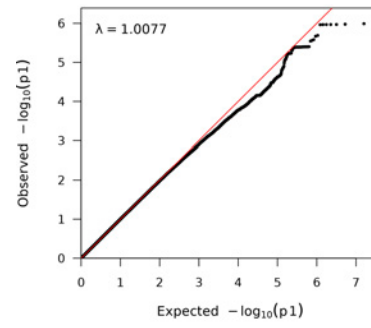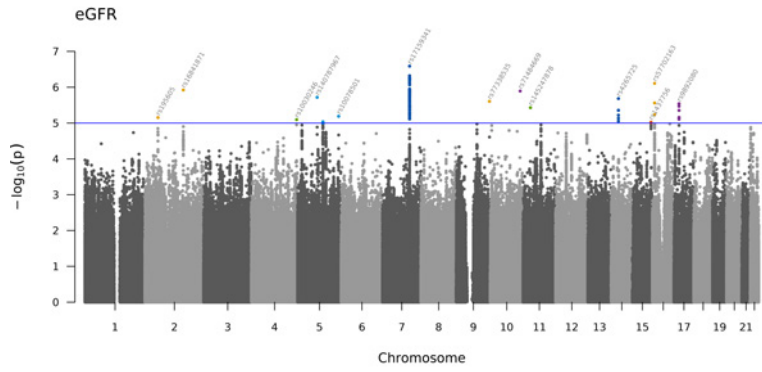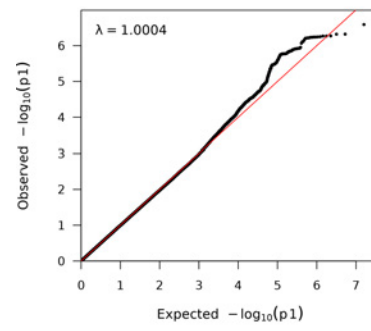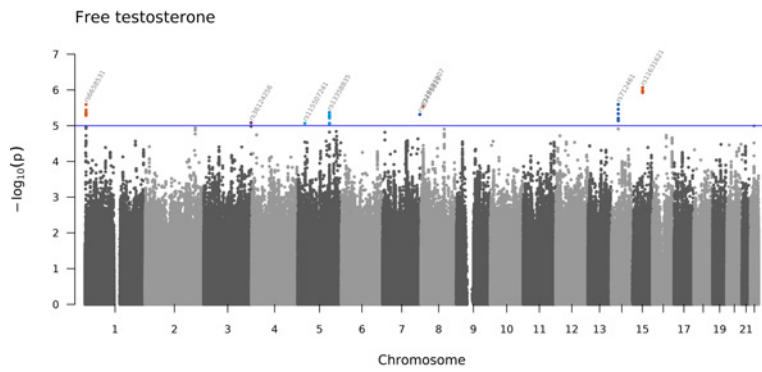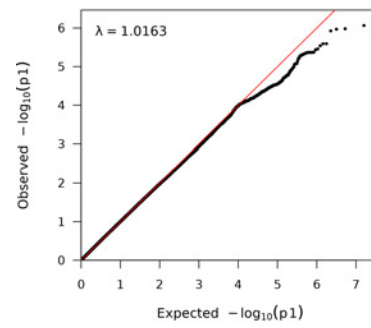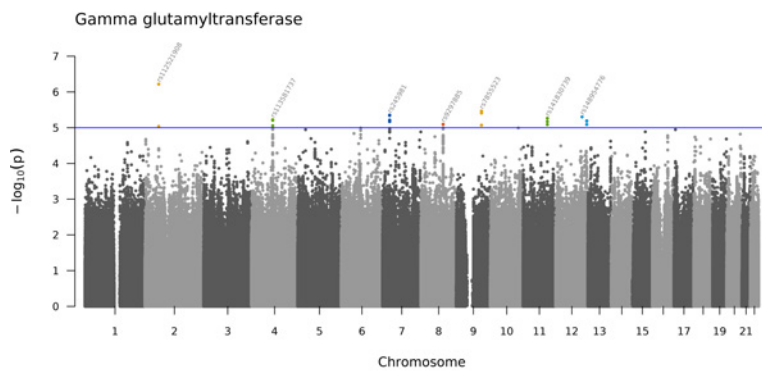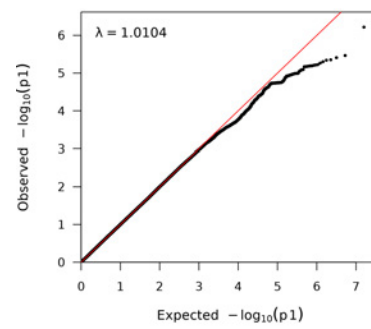



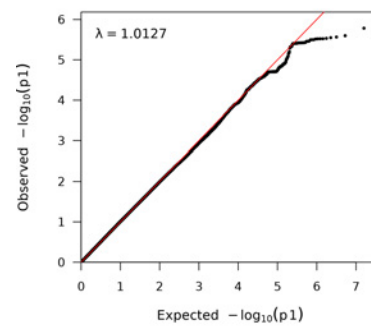



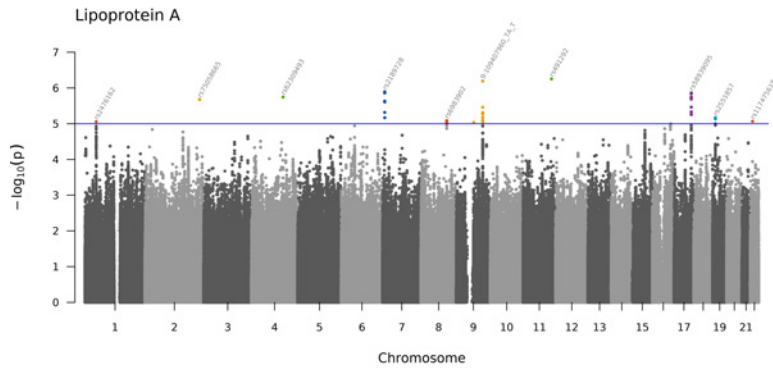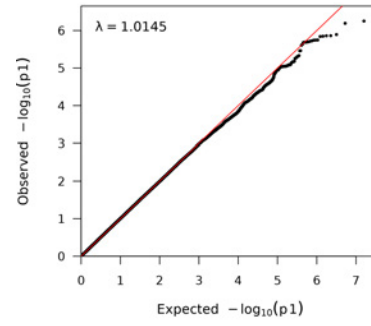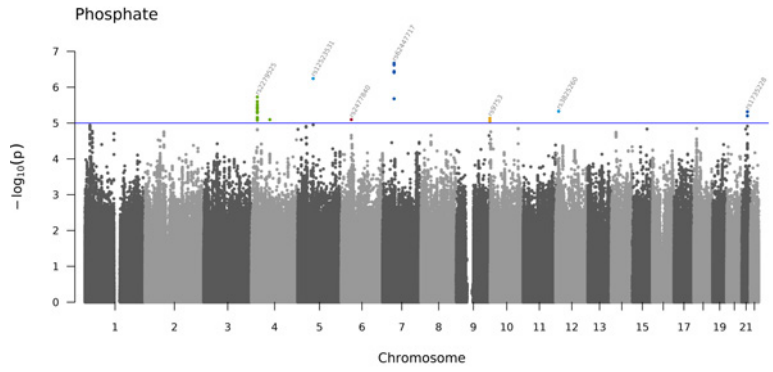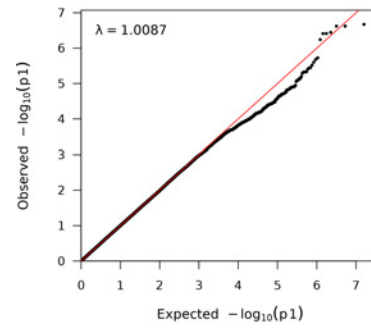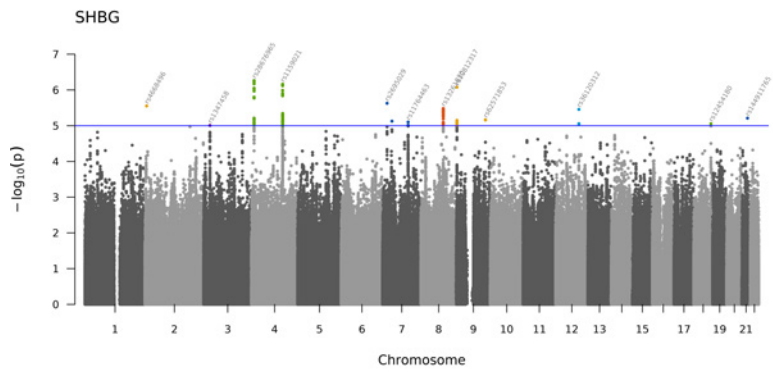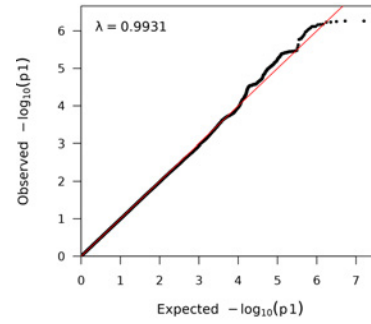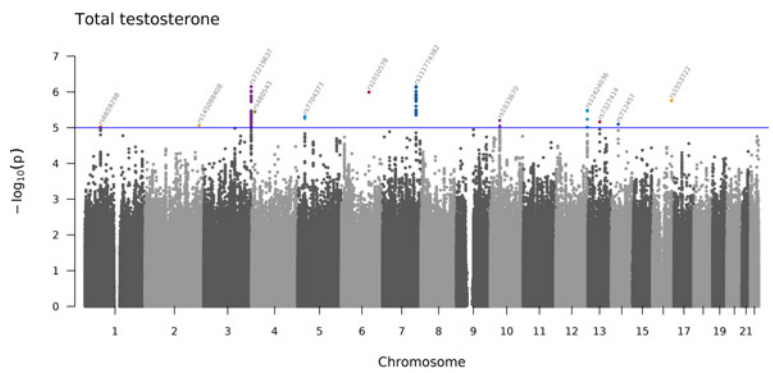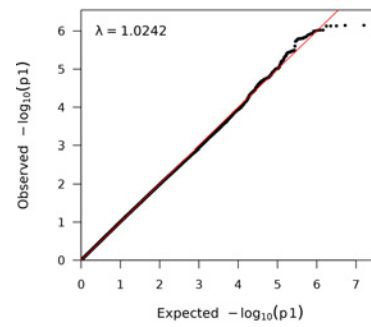



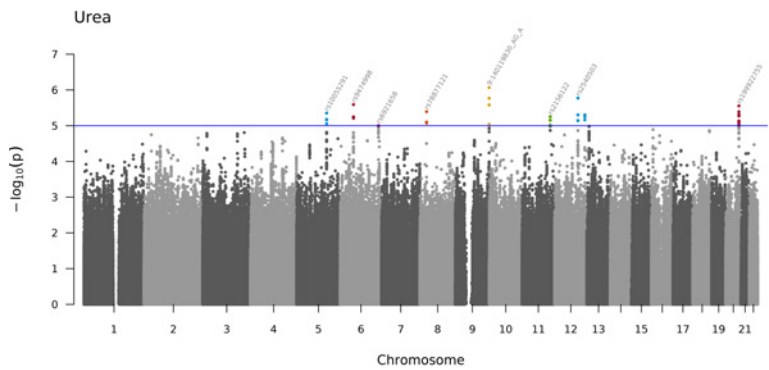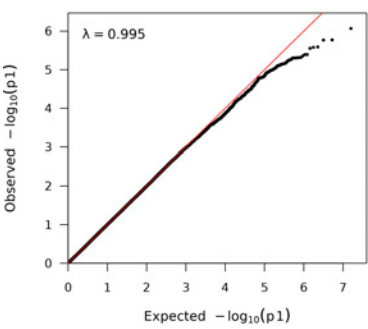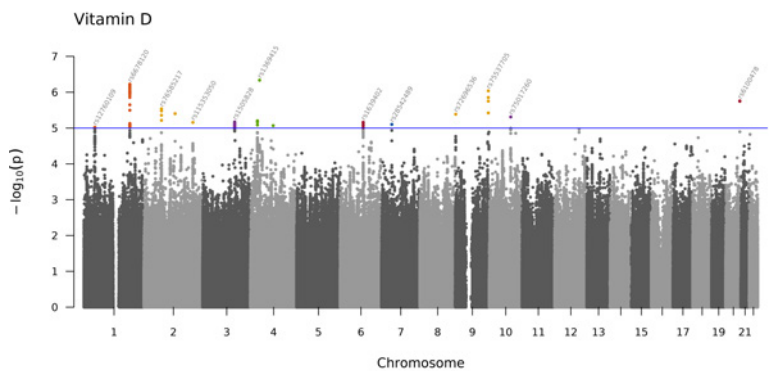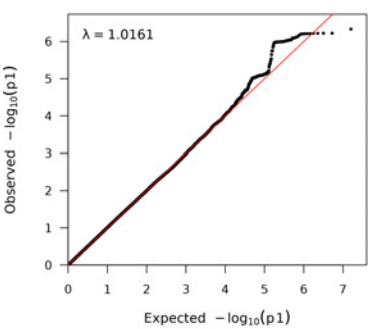

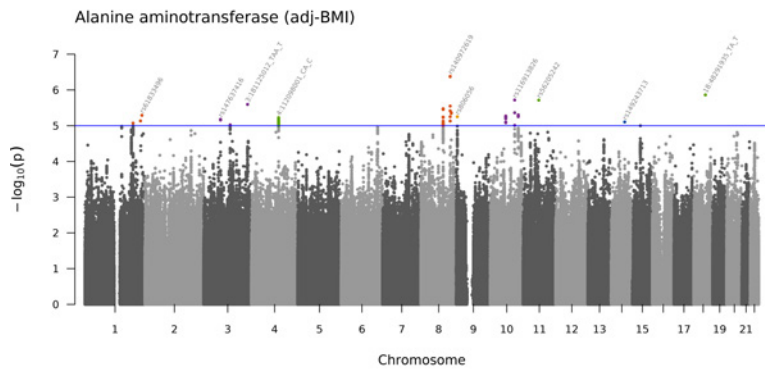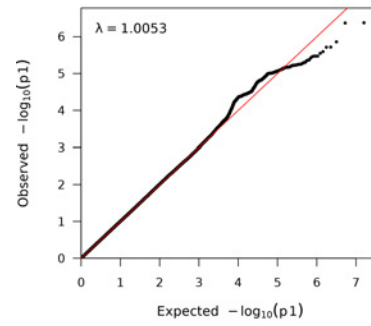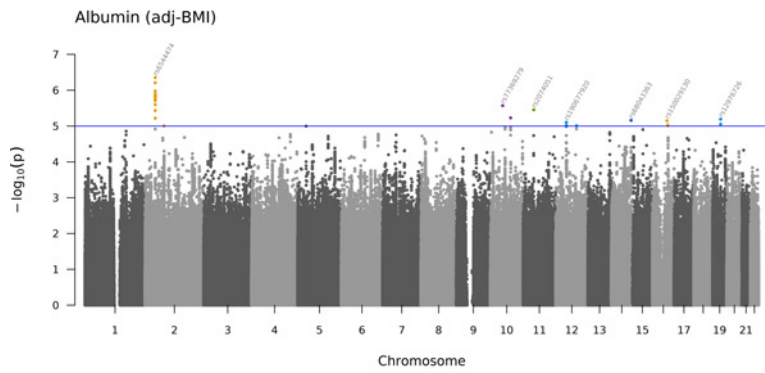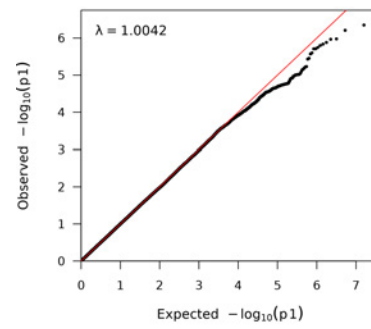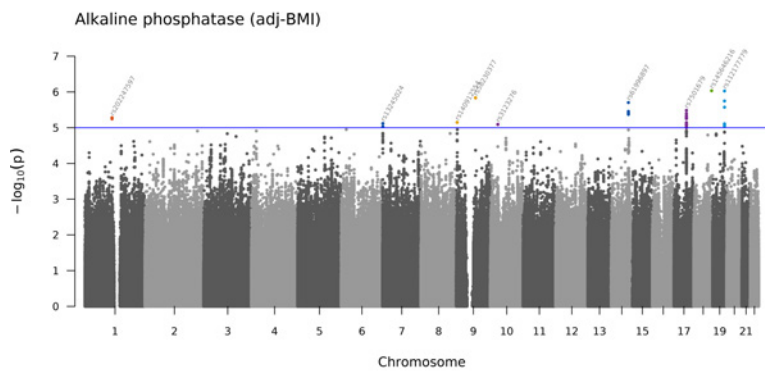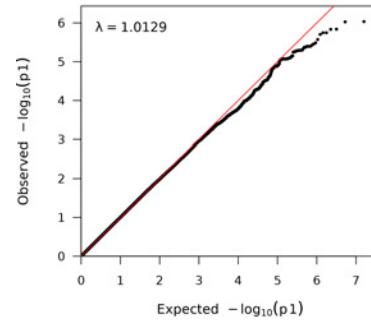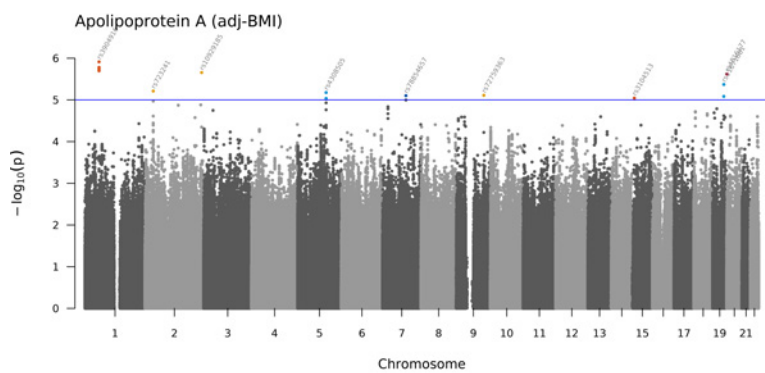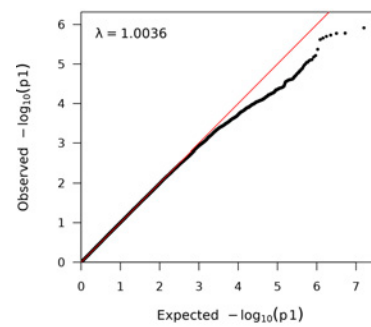

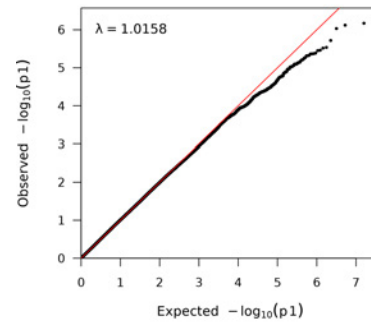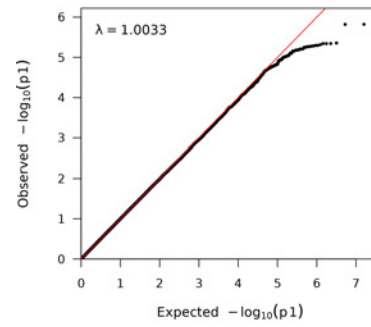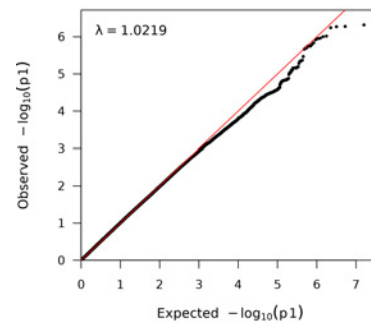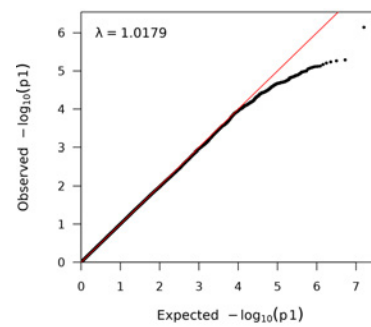

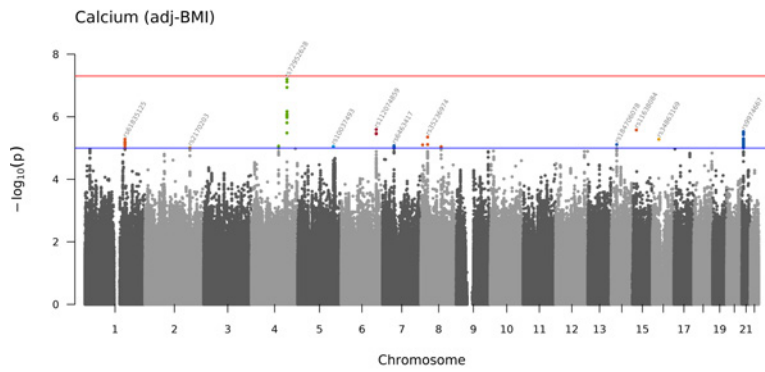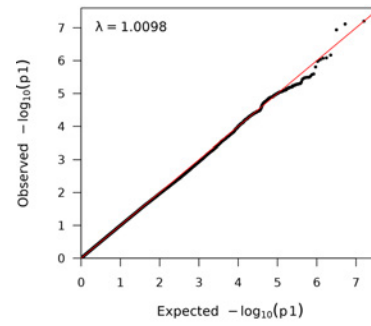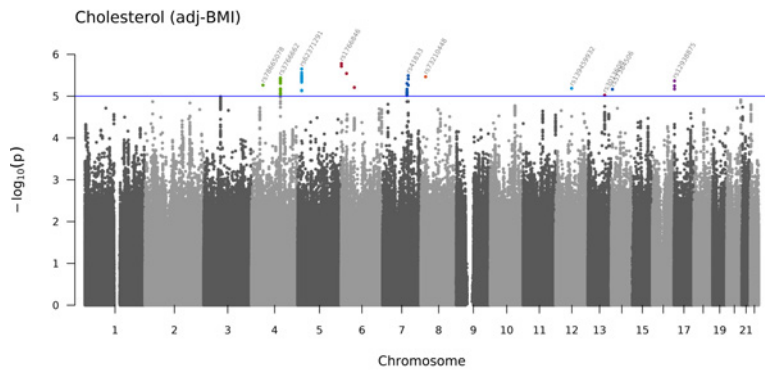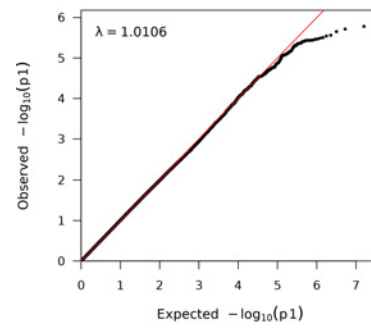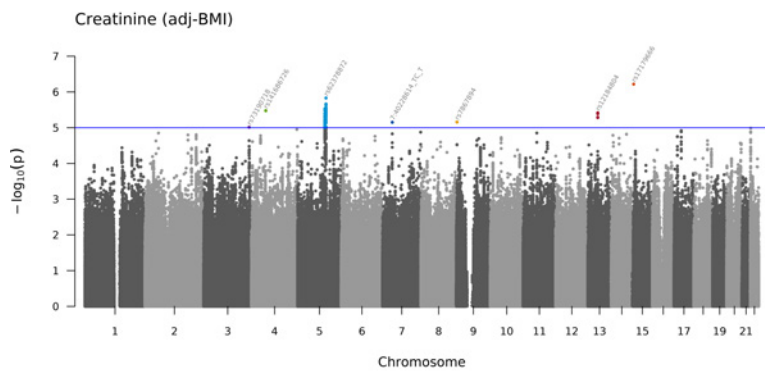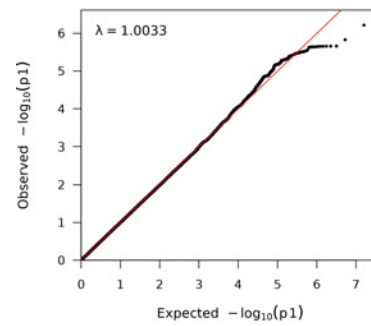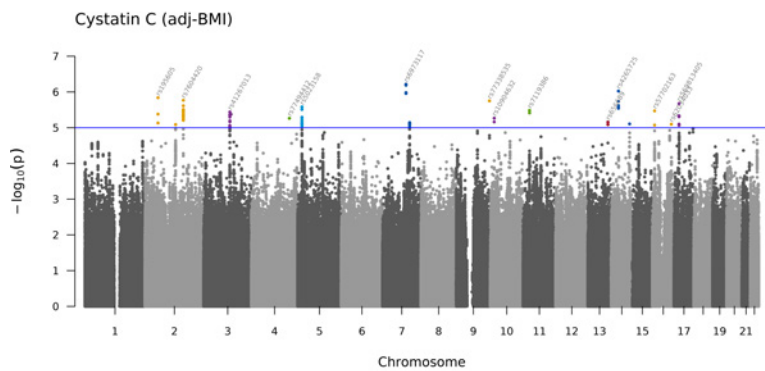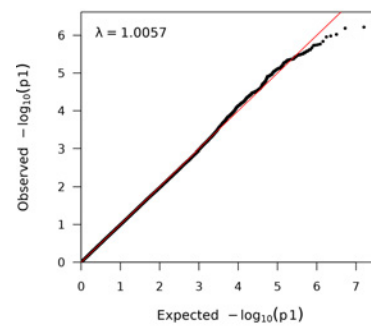



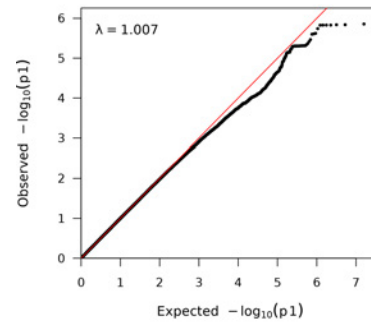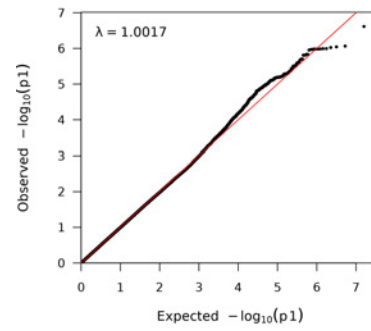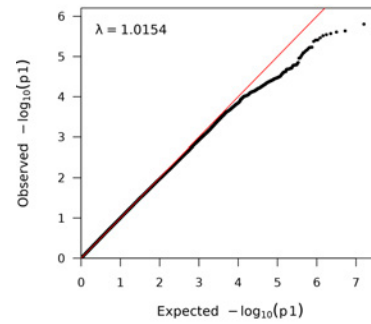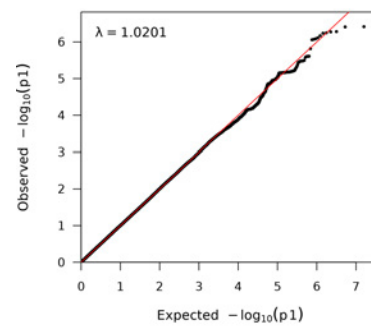

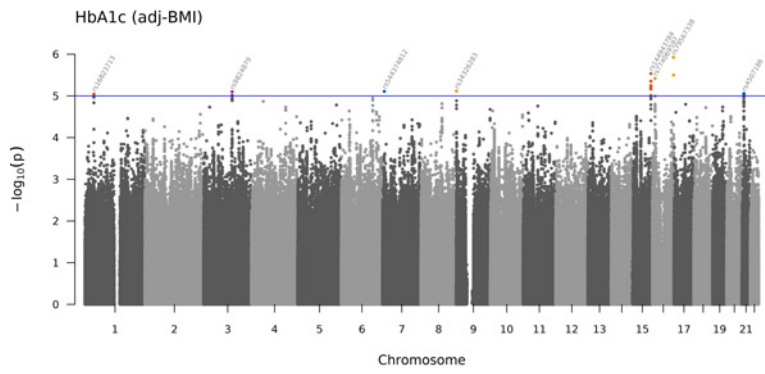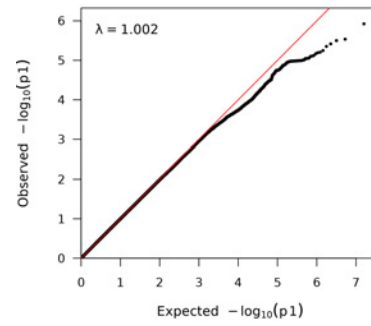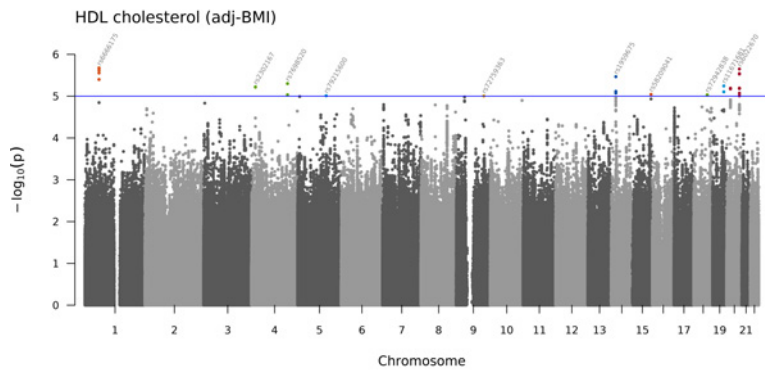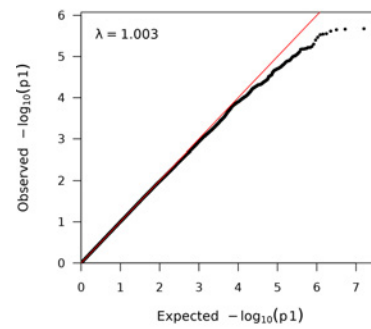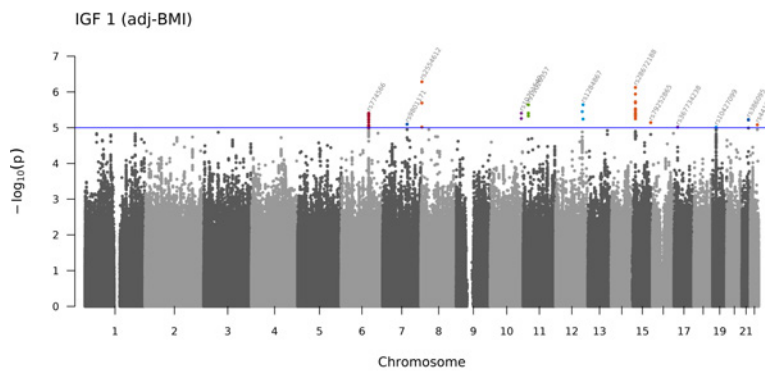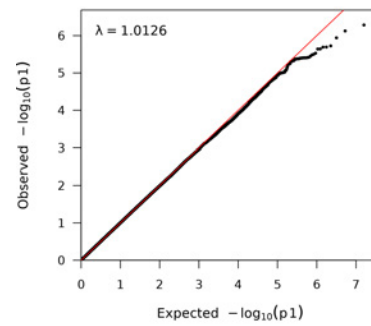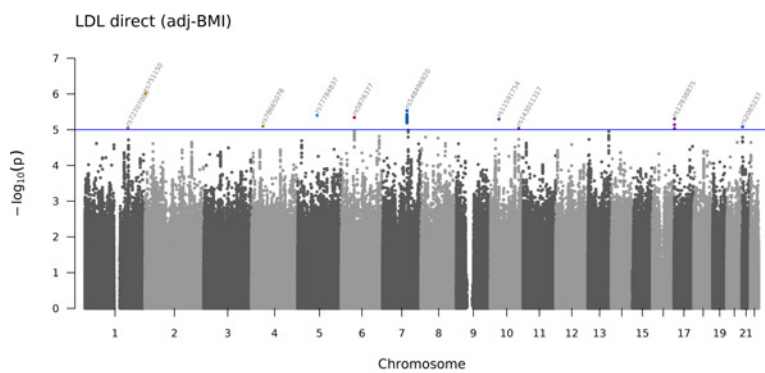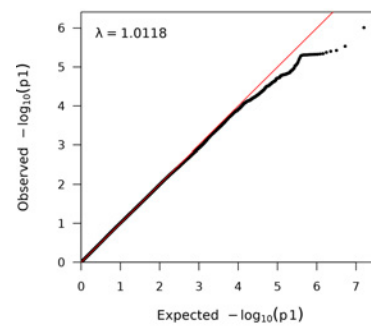

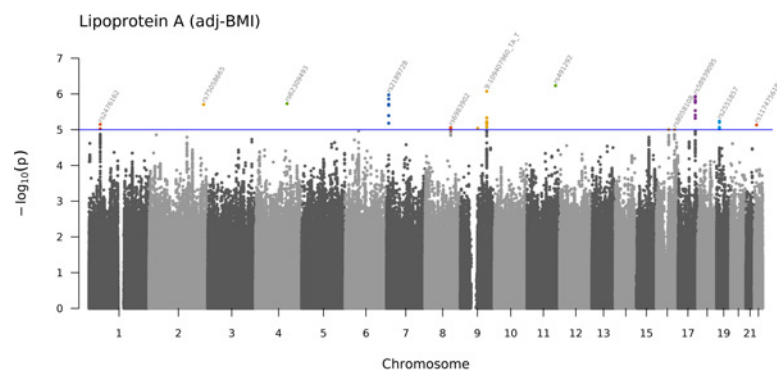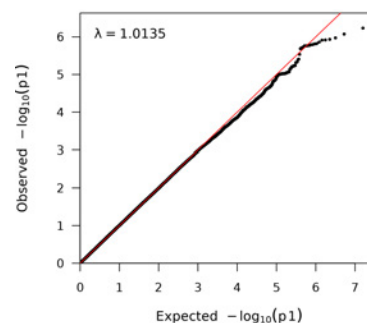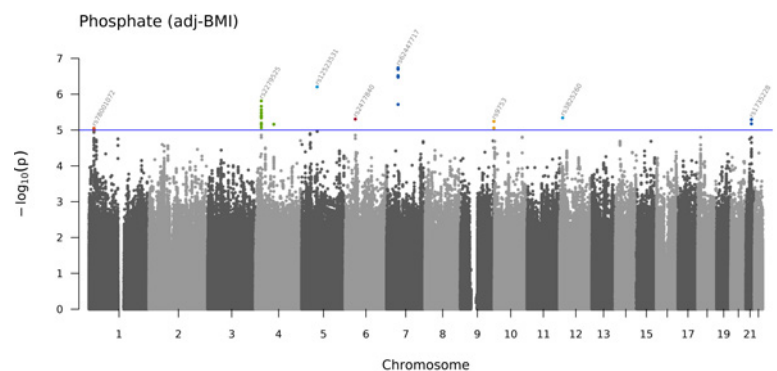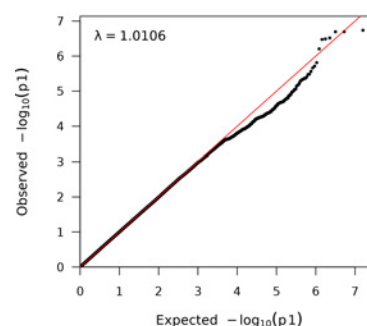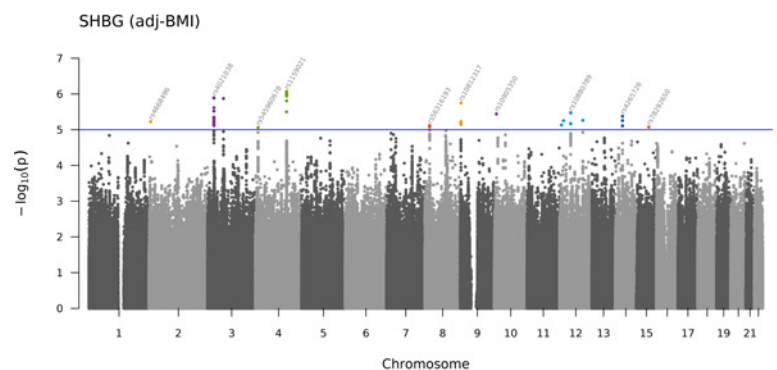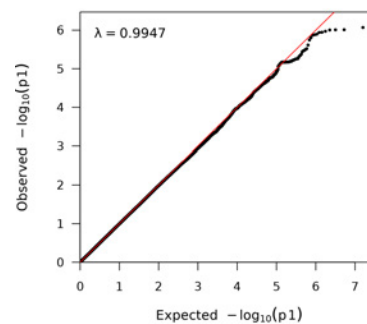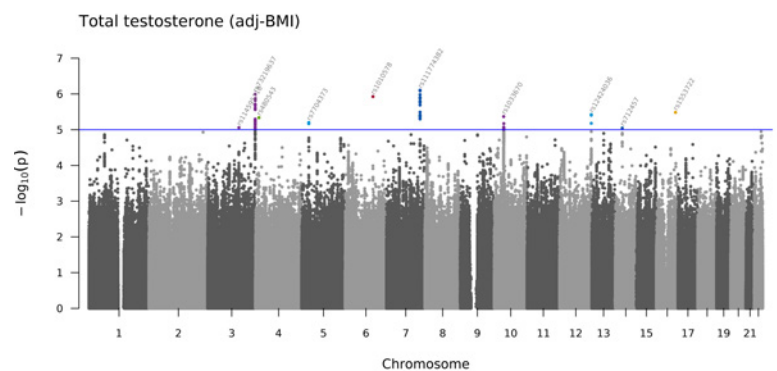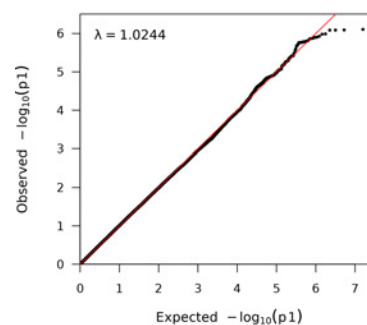

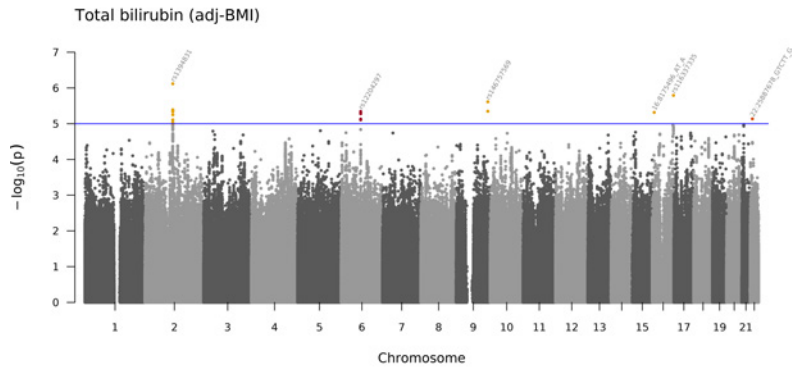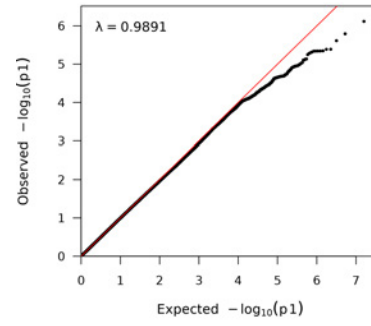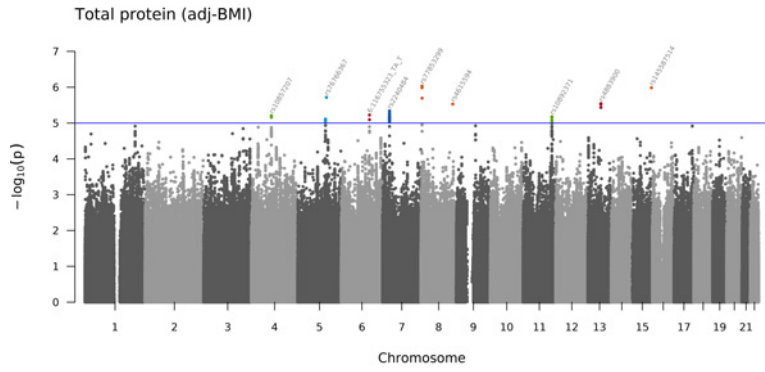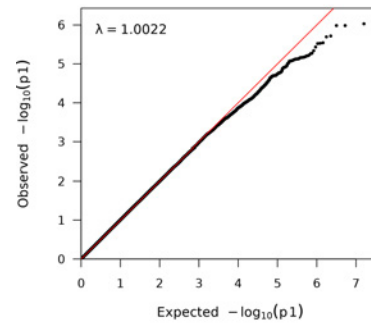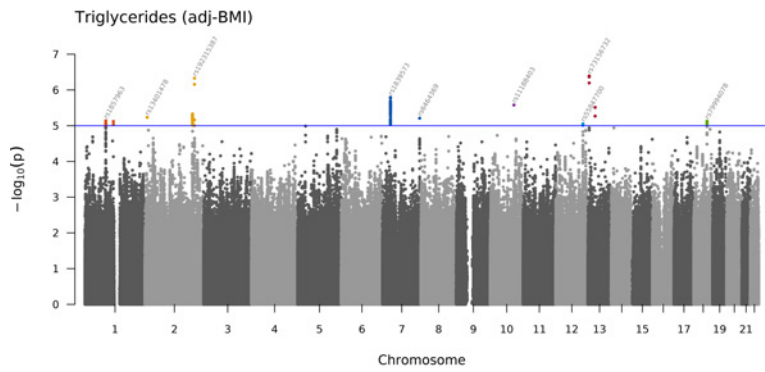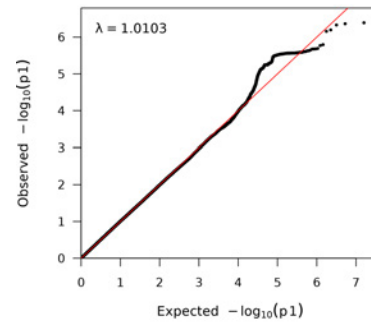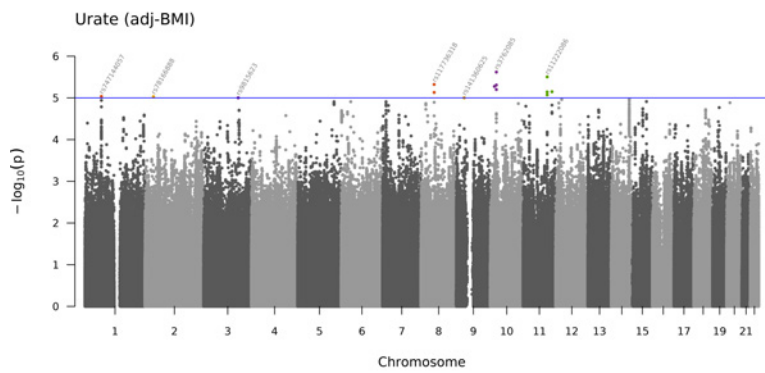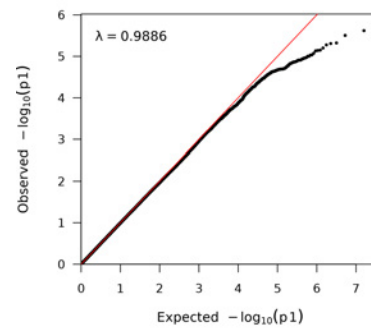

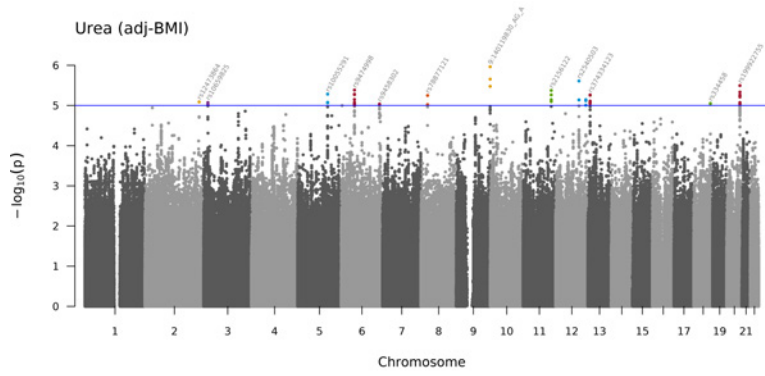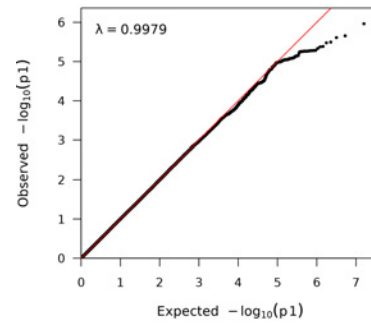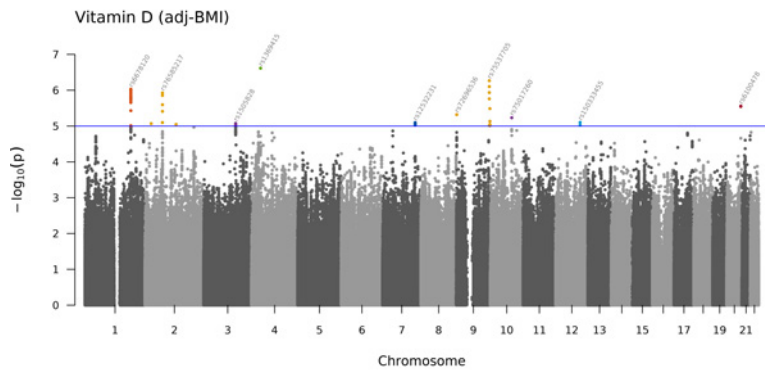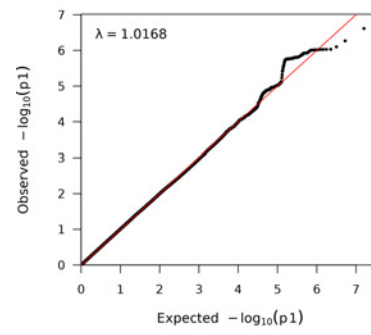

S7

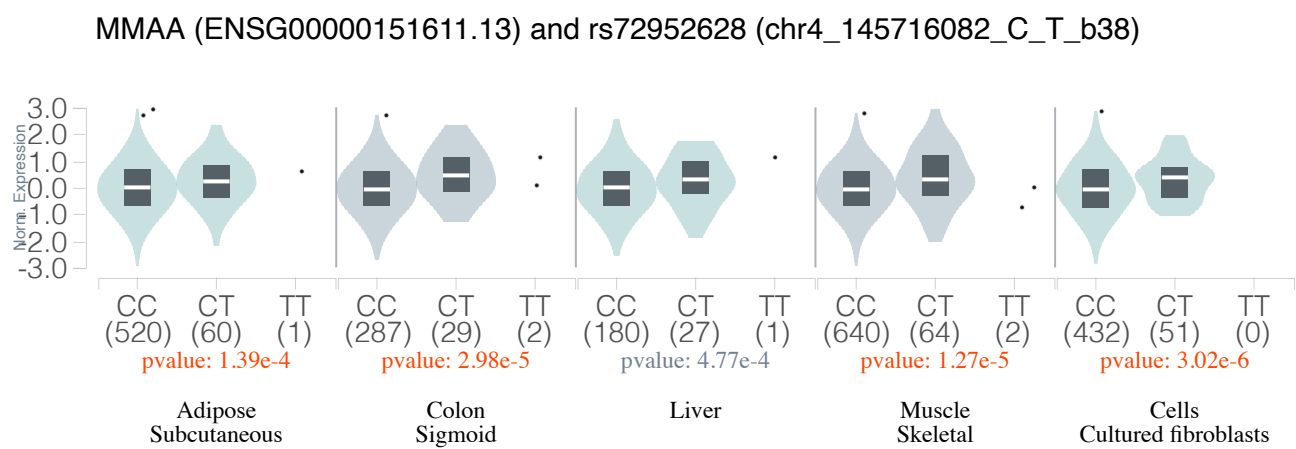



Bulk tissue gene expression for MMAA (ENSG00000151611.13)

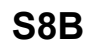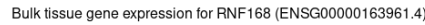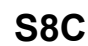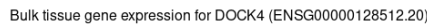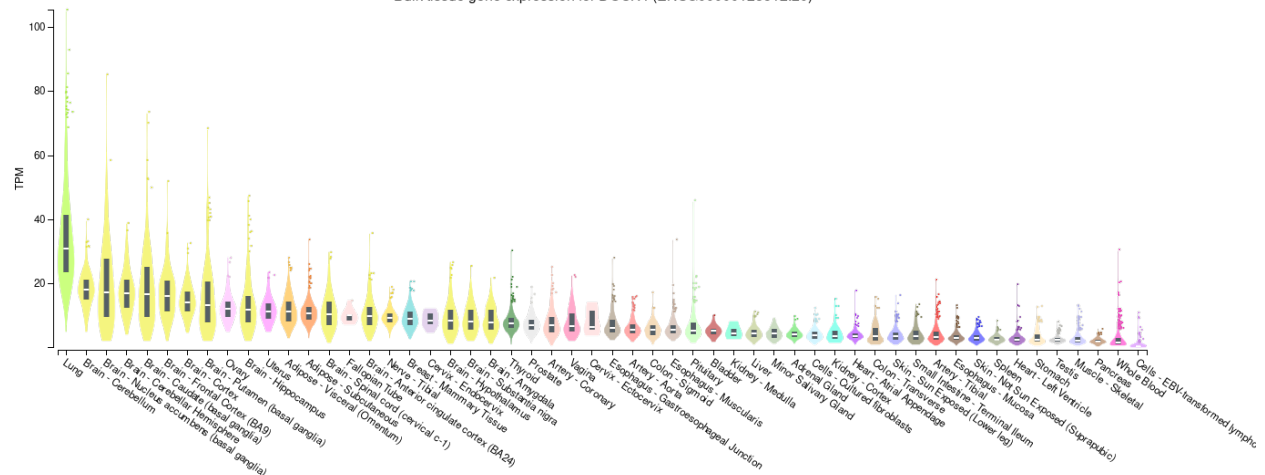

S9

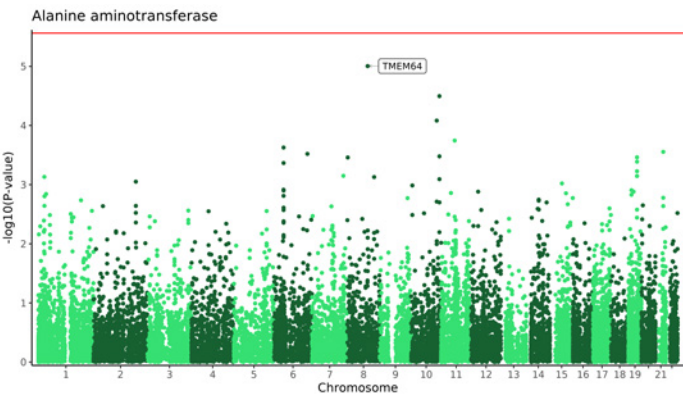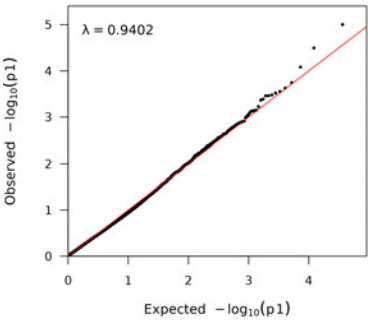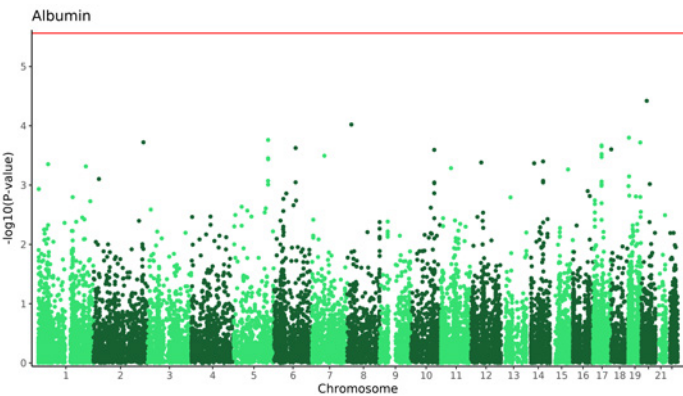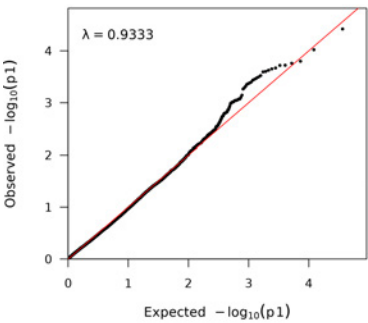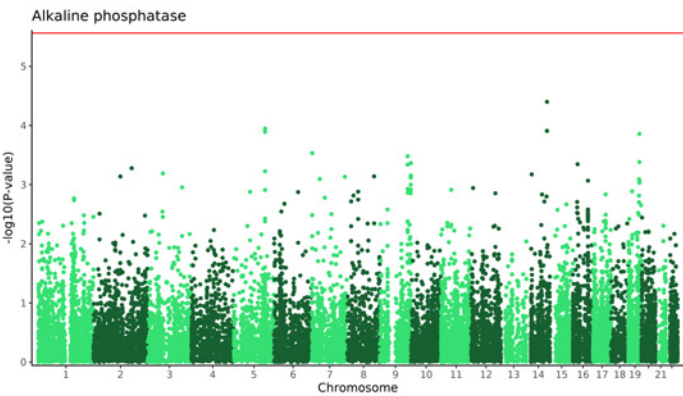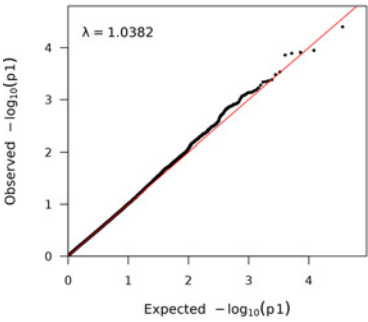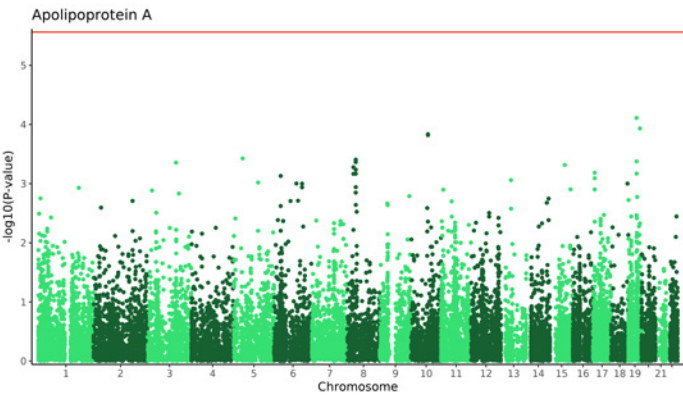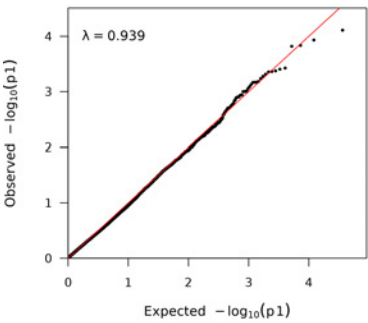

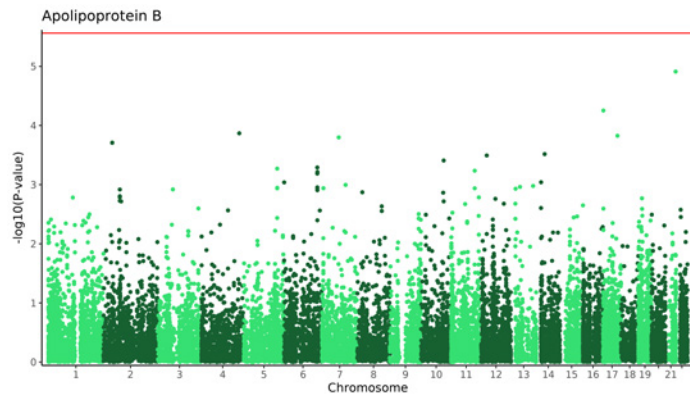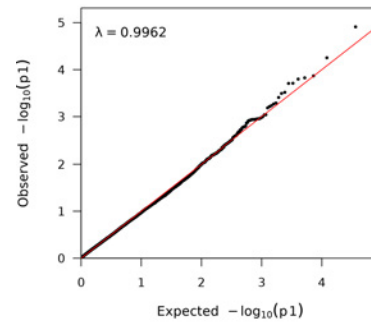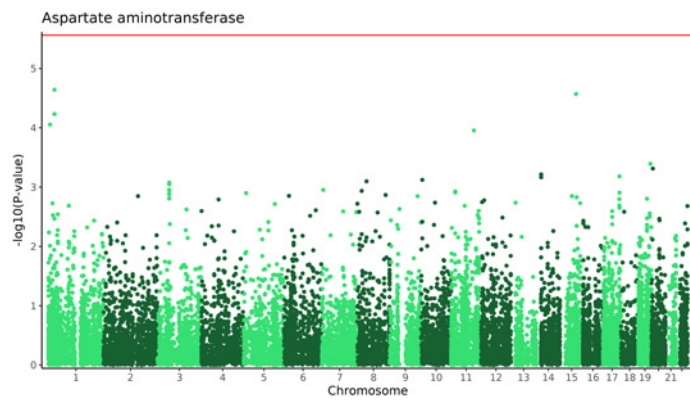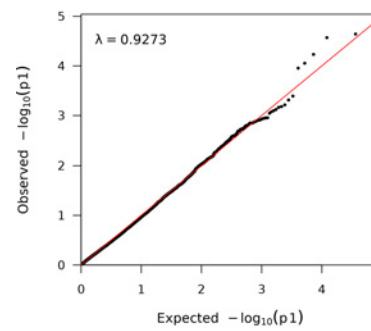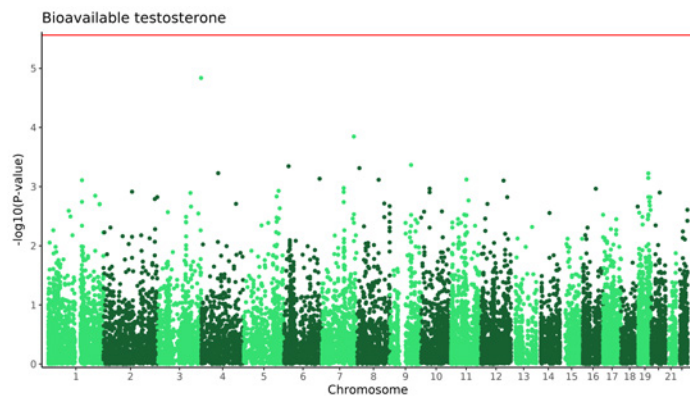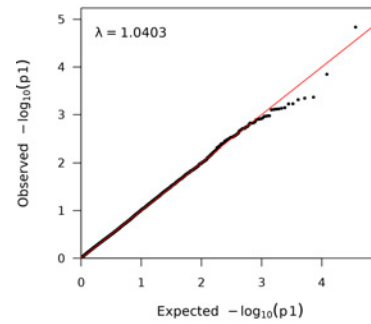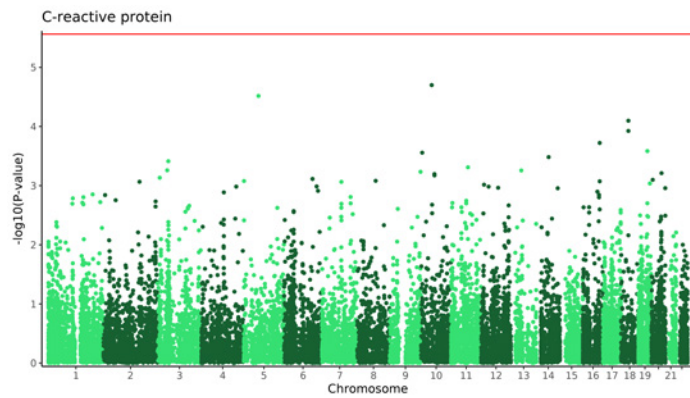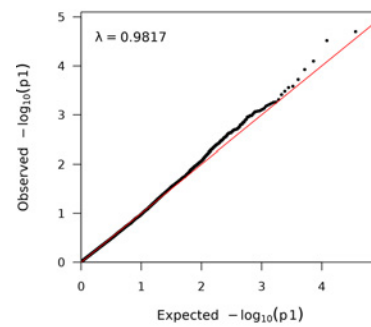

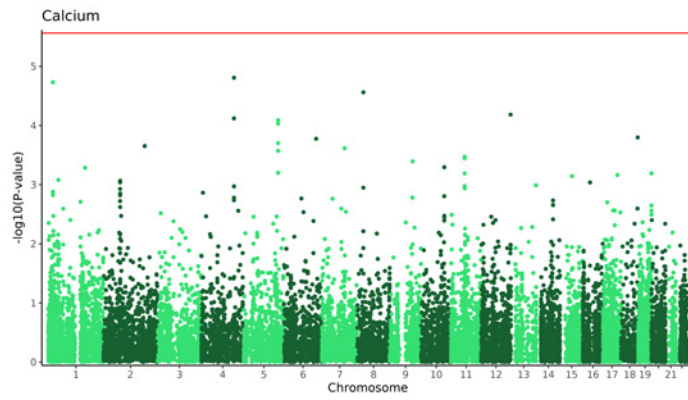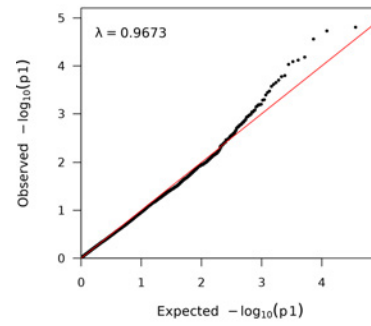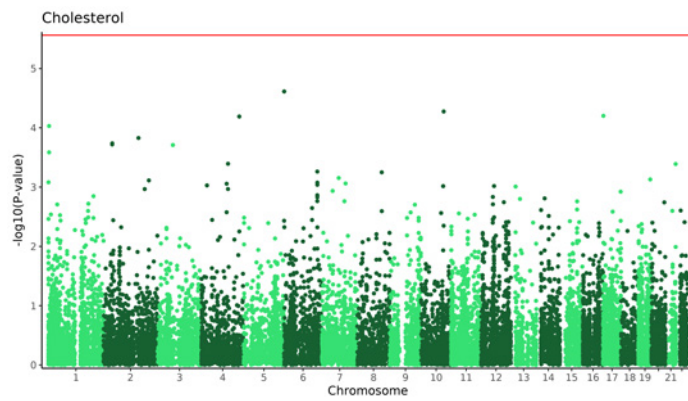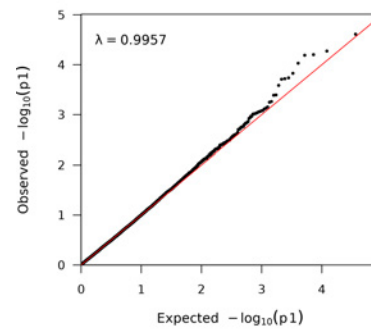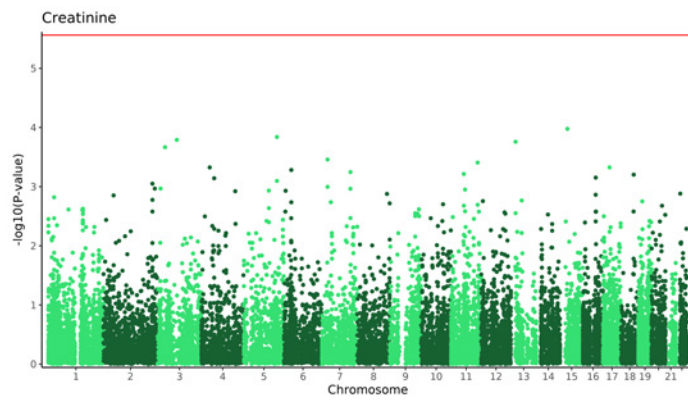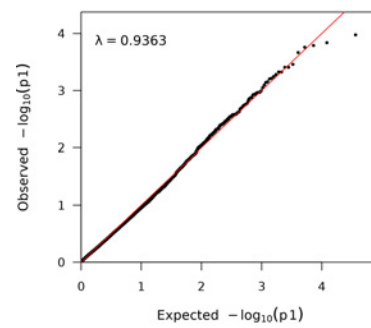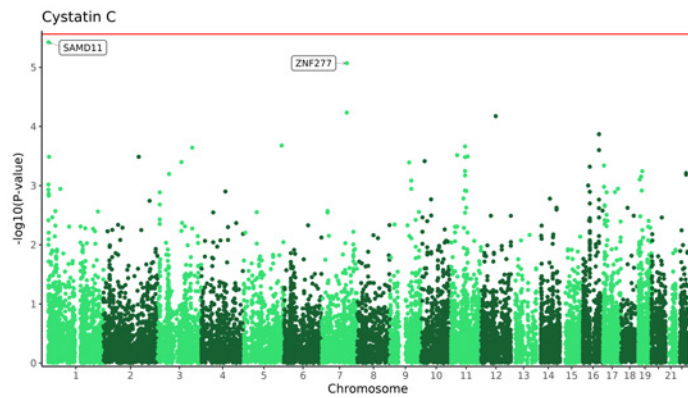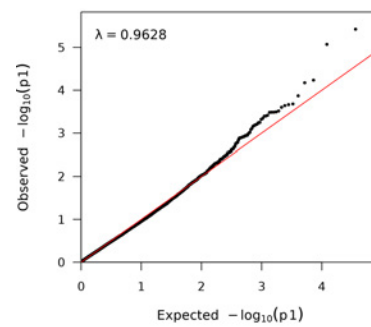



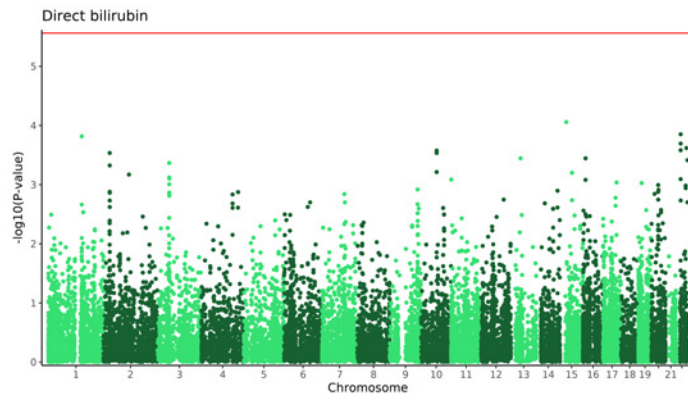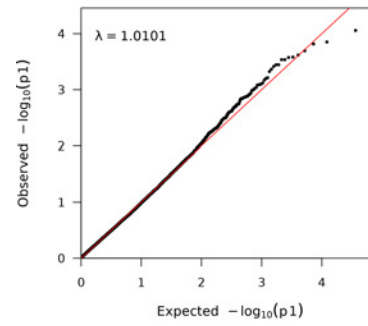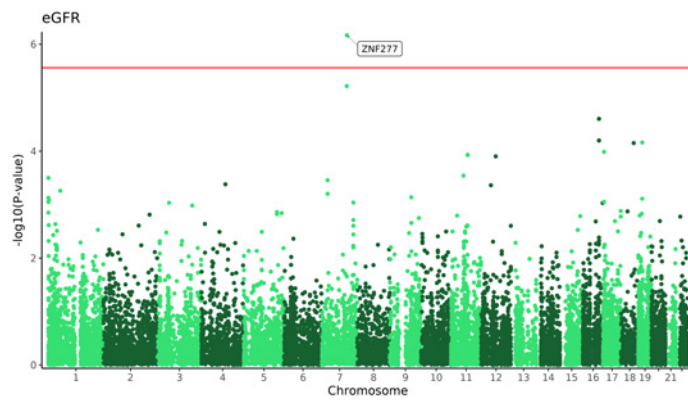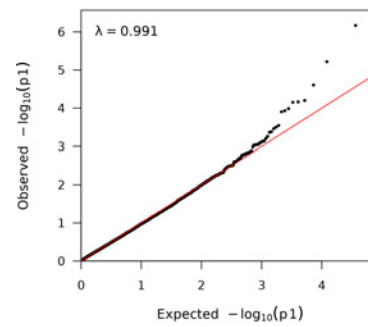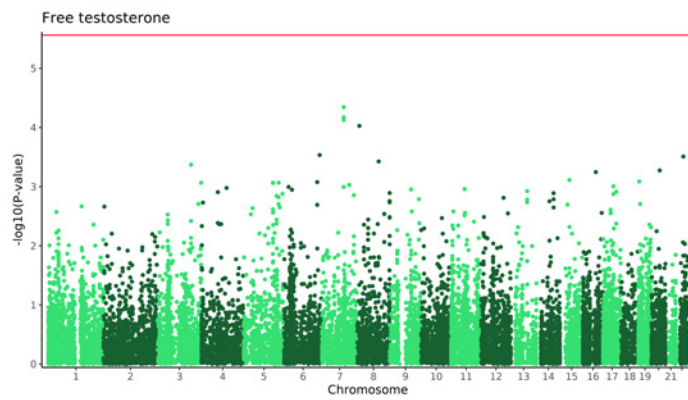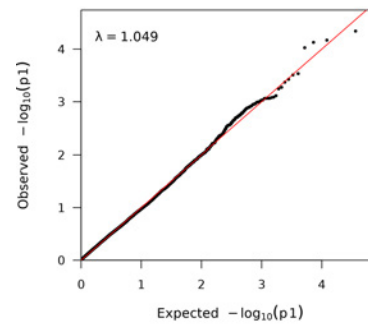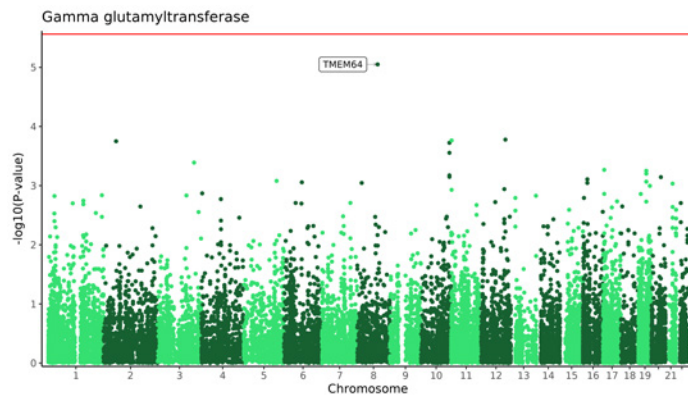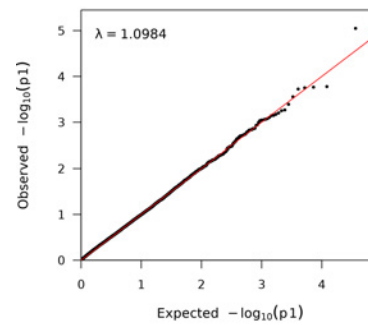

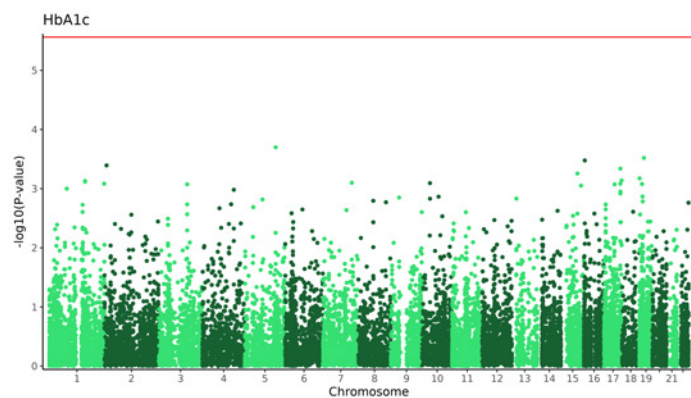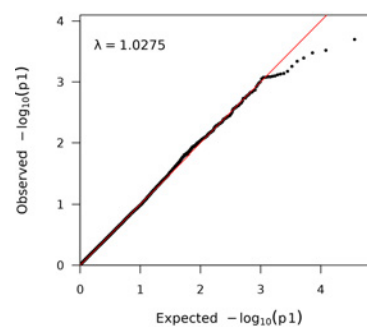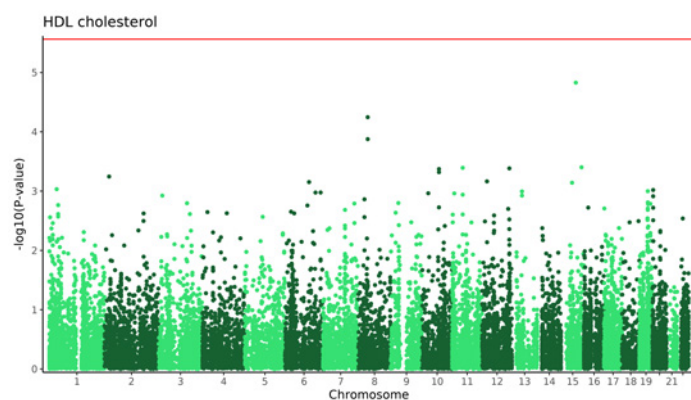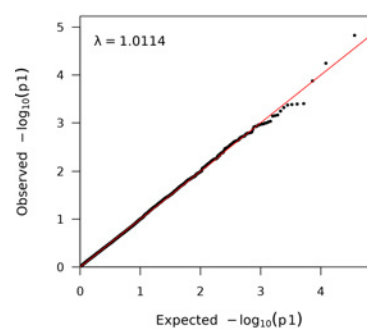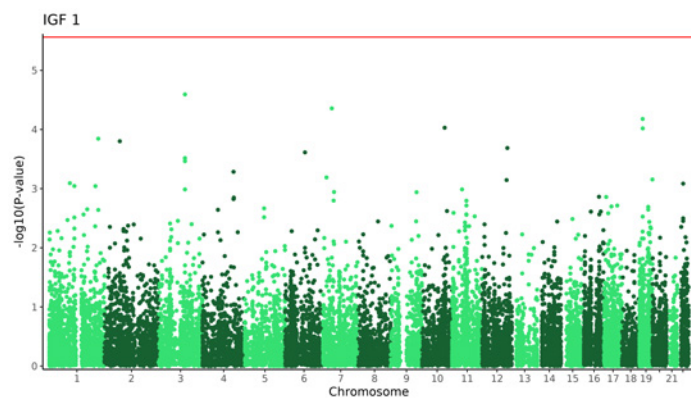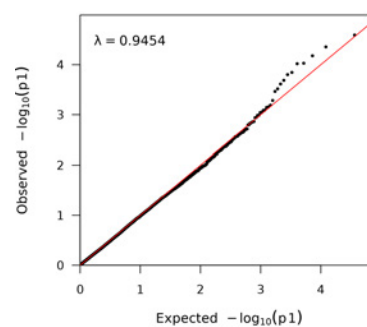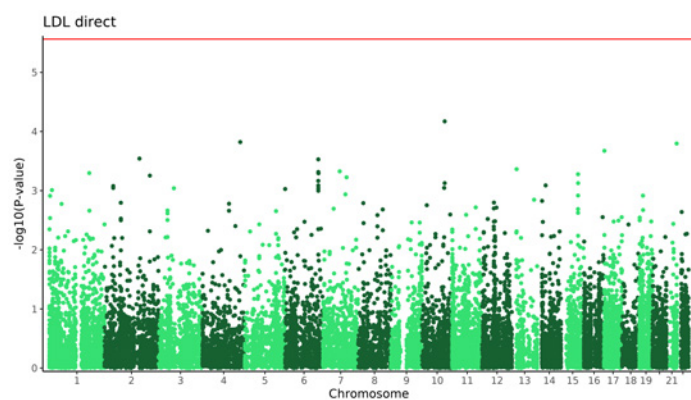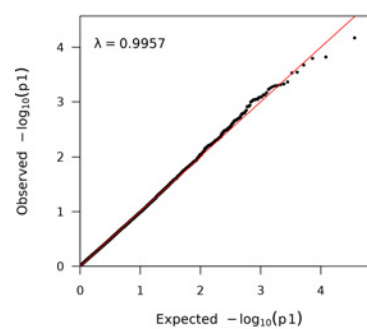



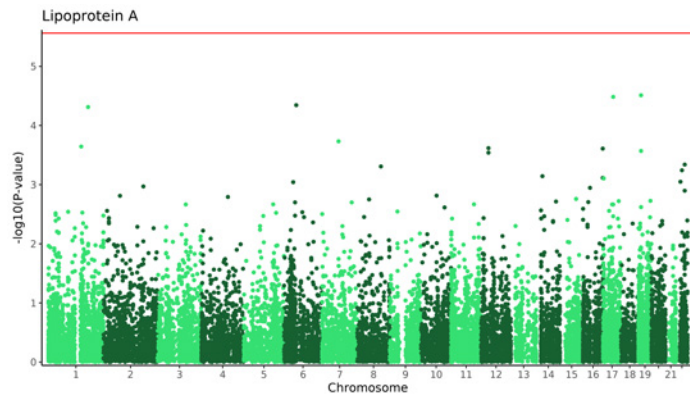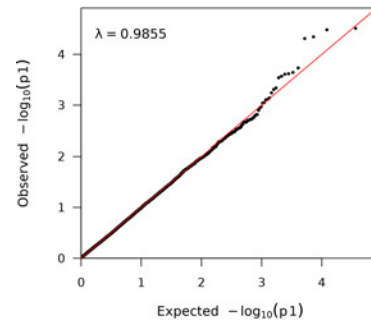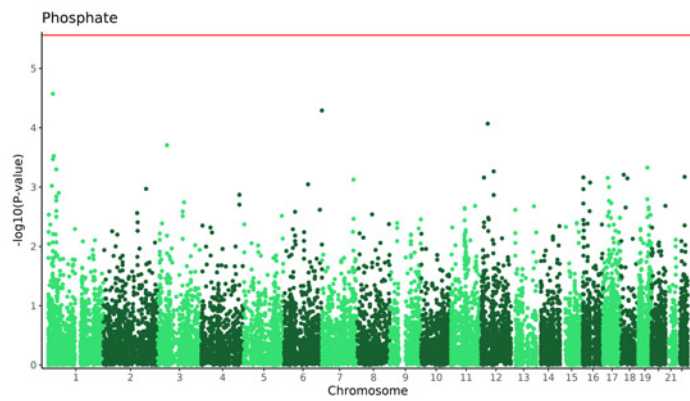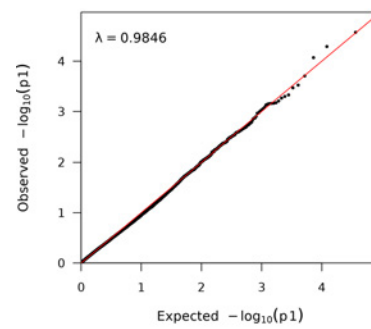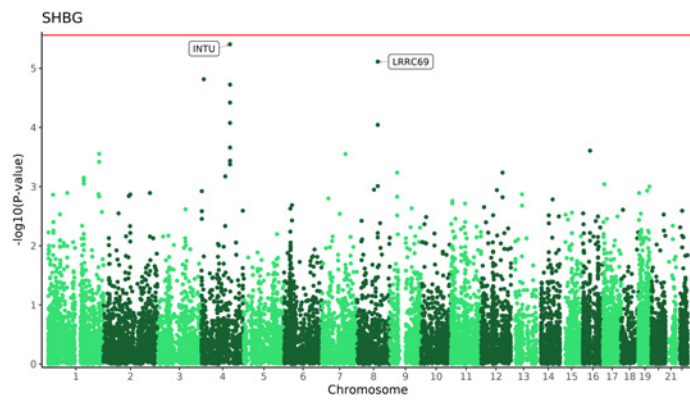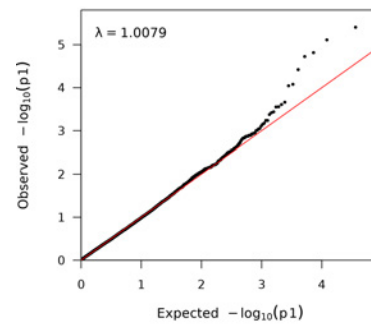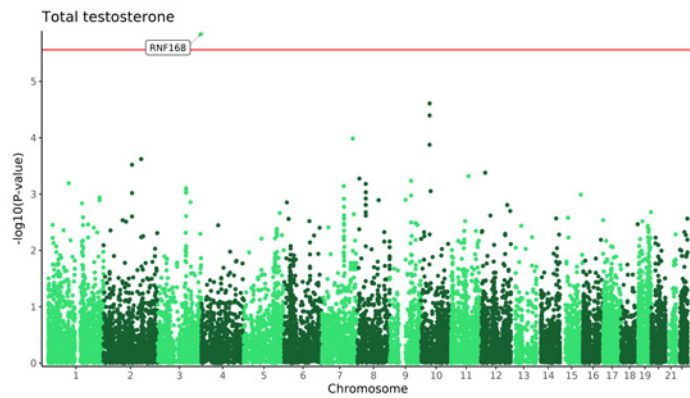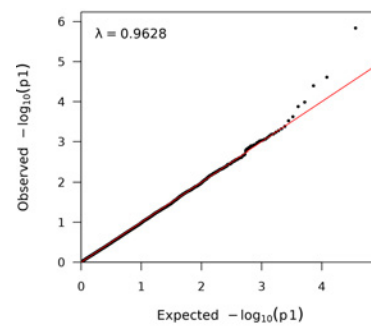

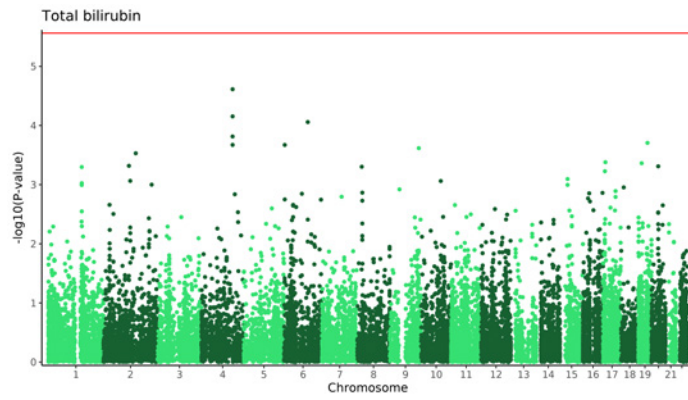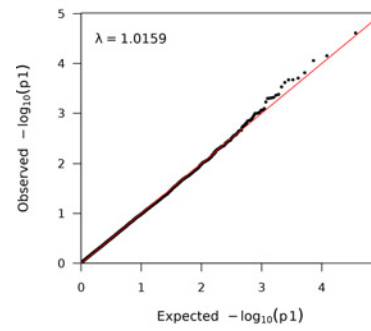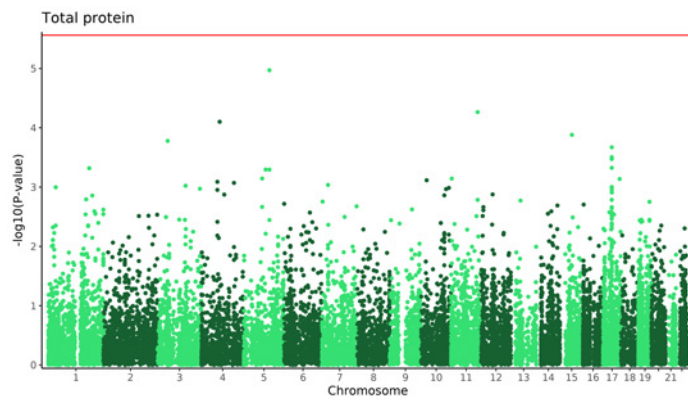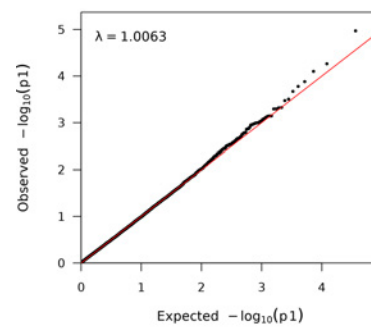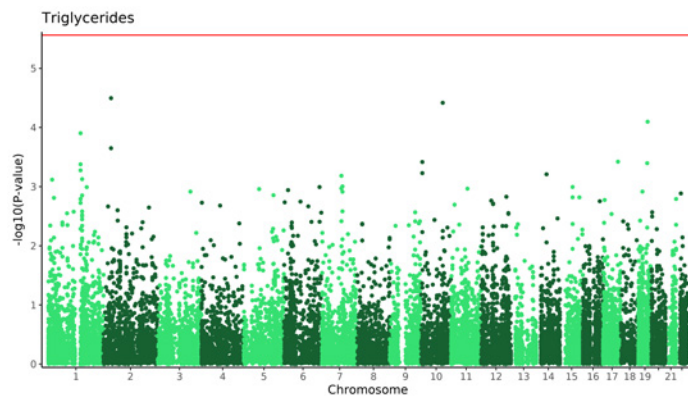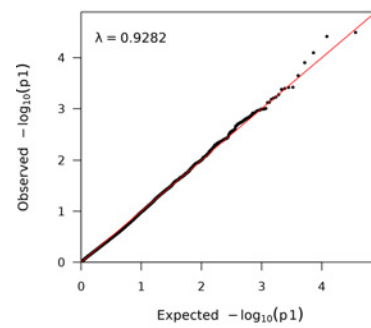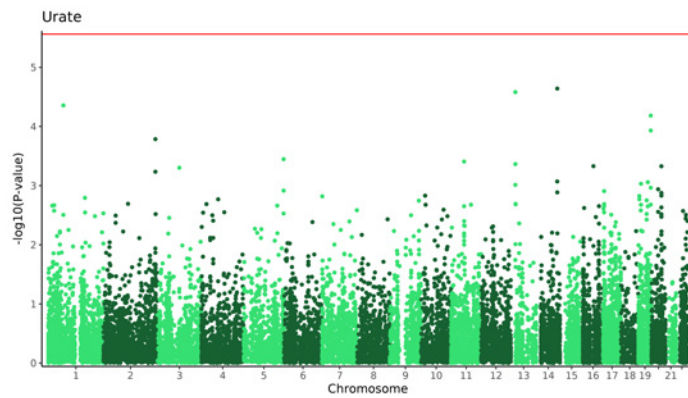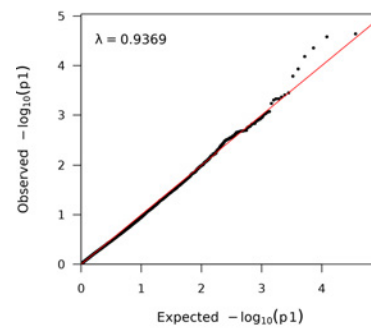

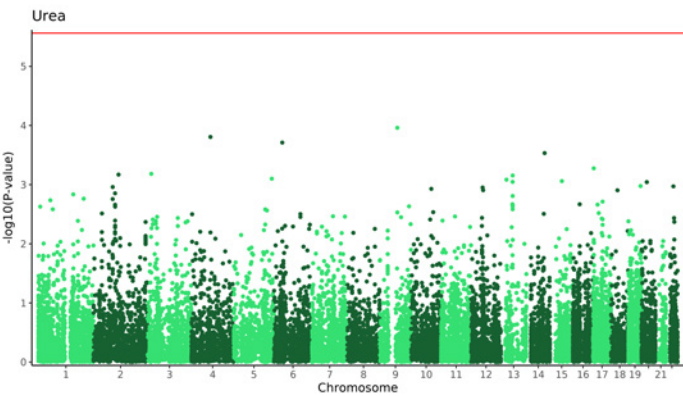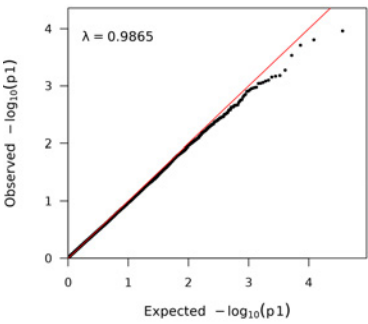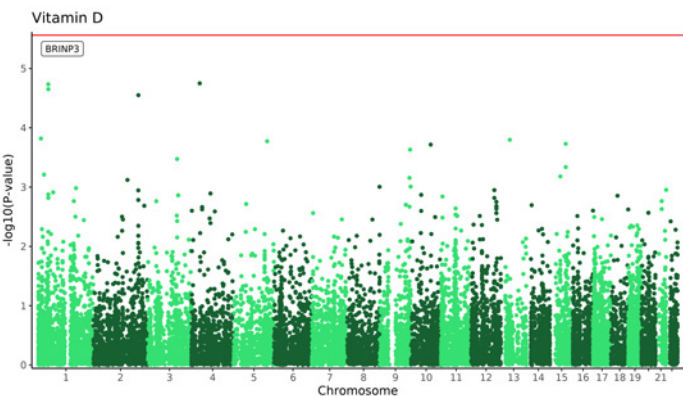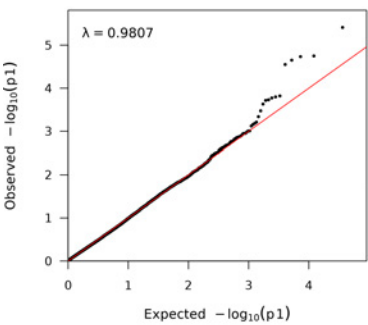

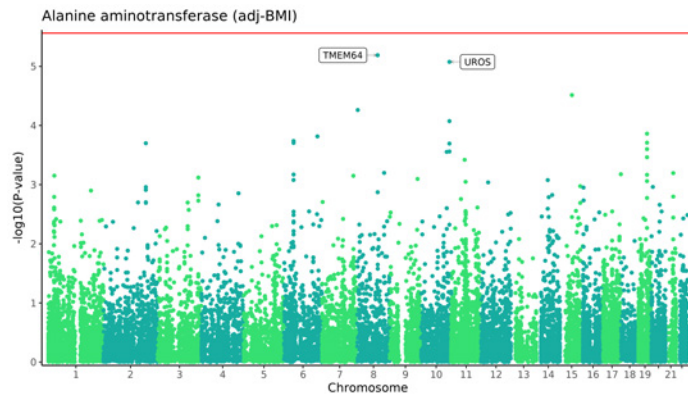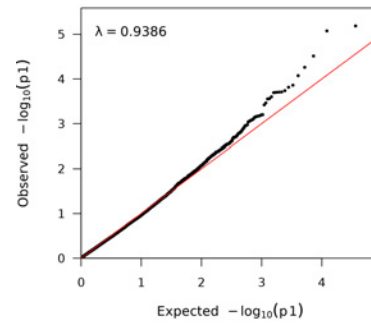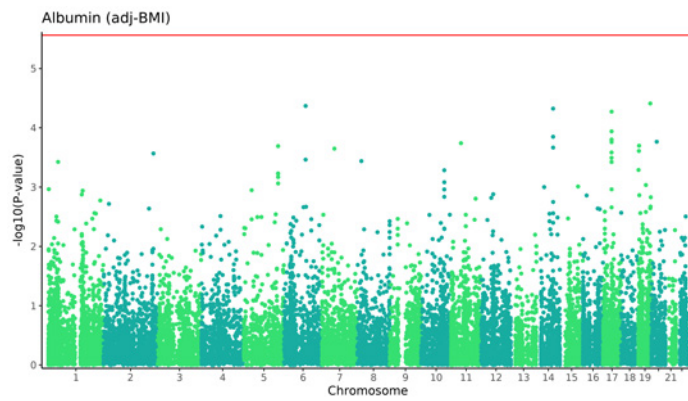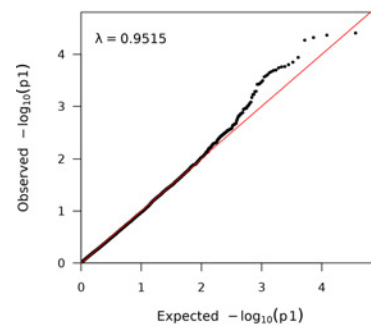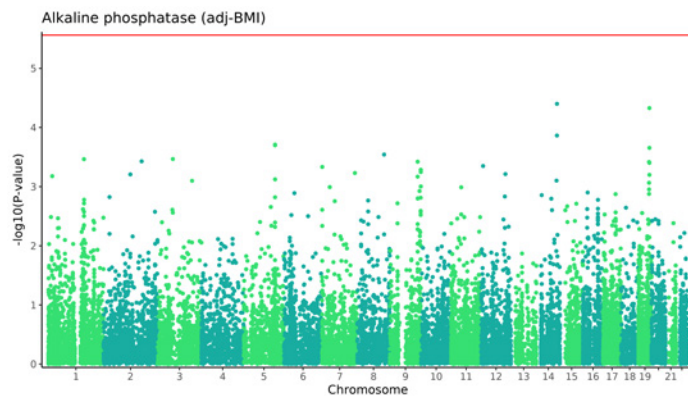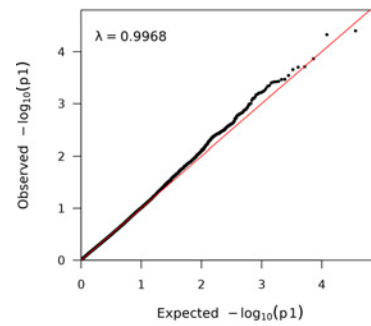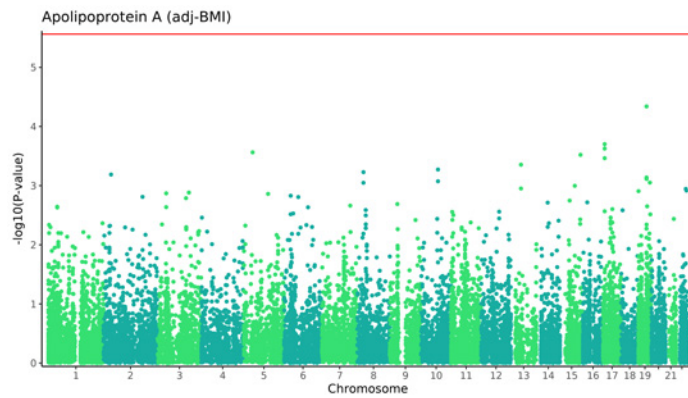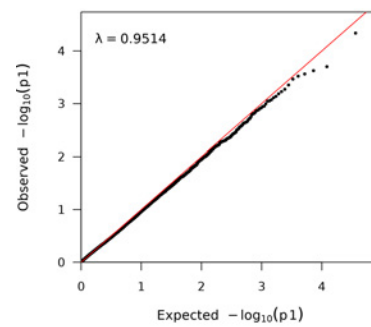



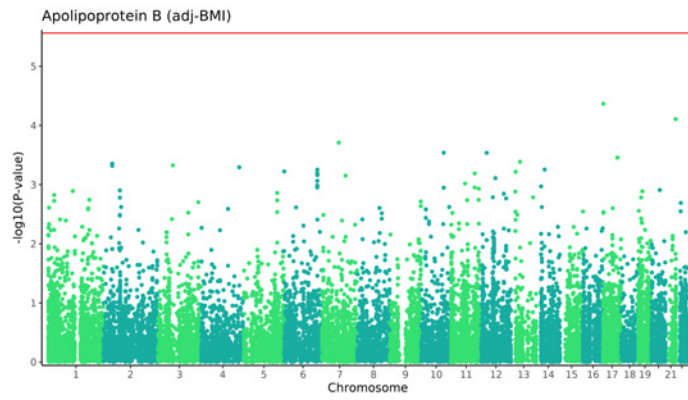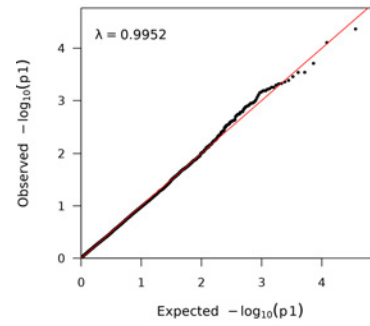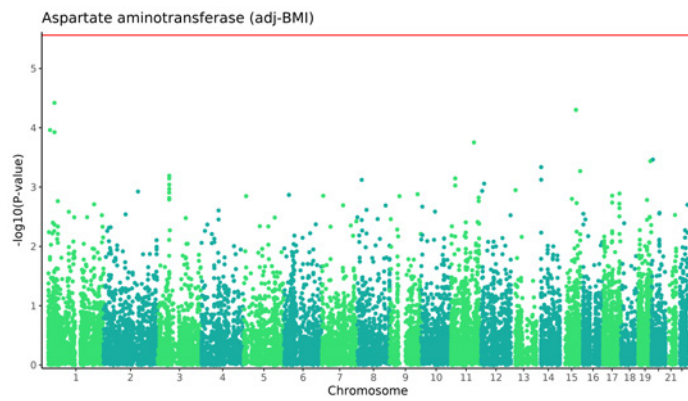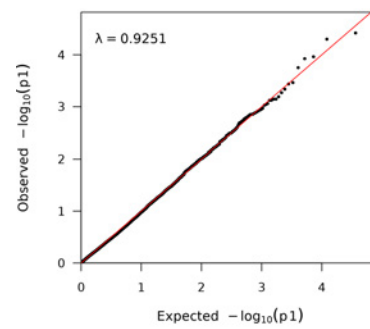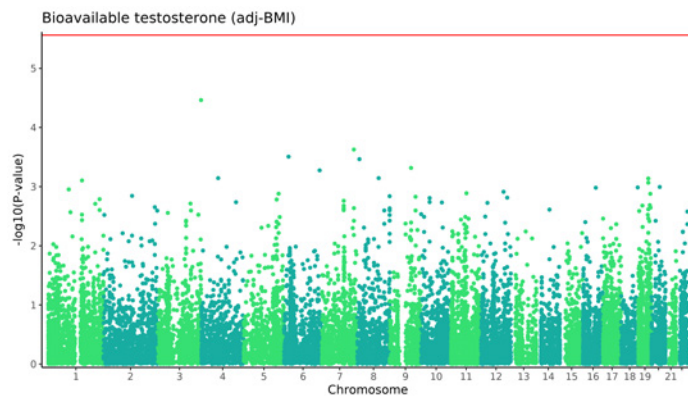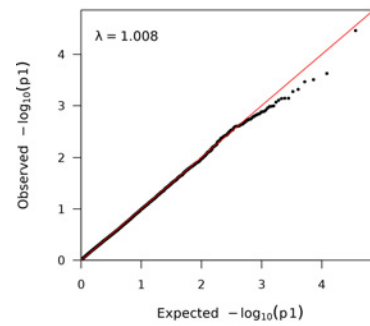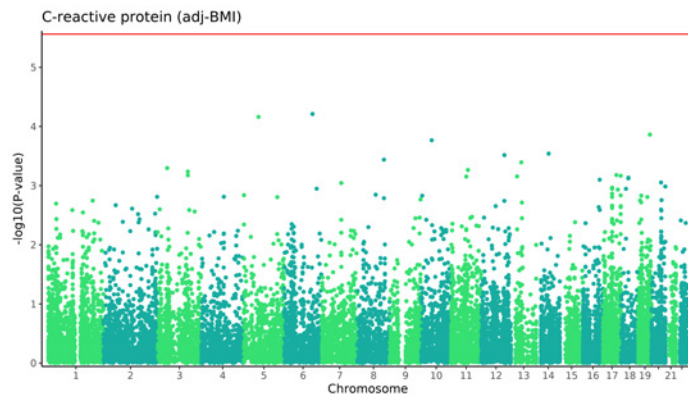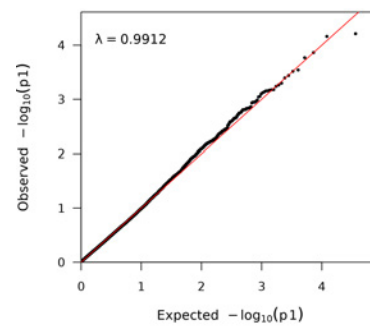

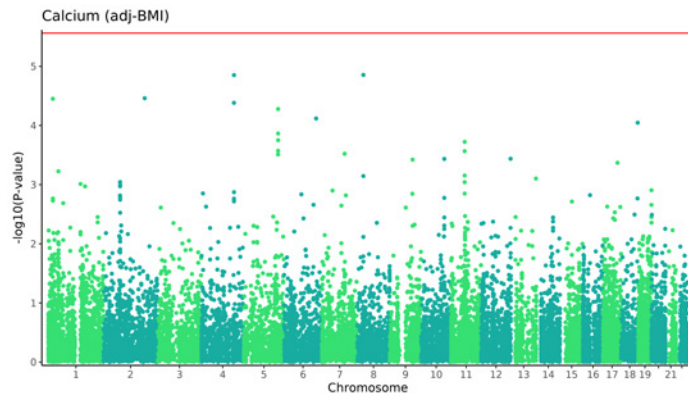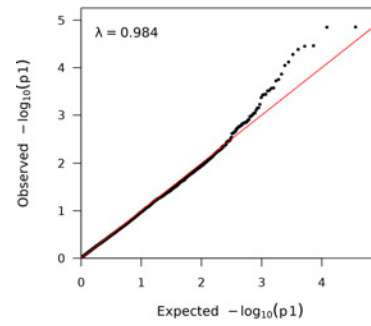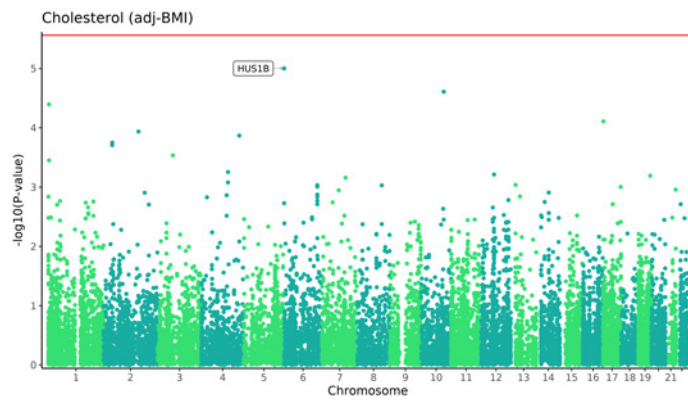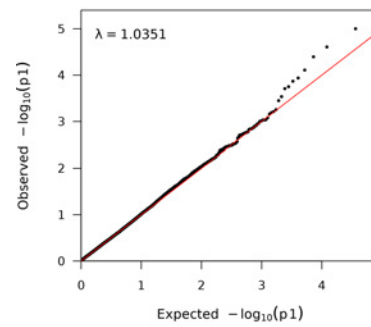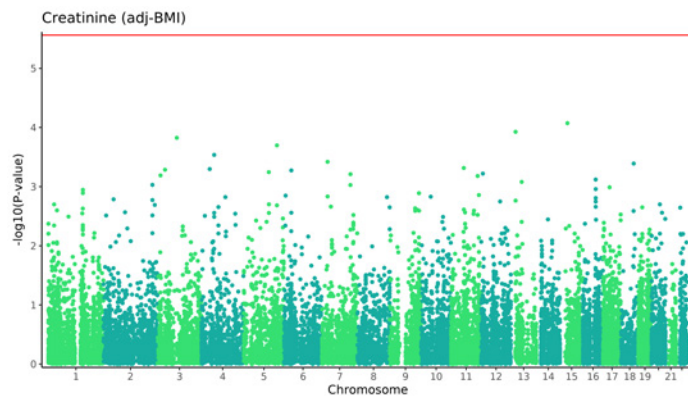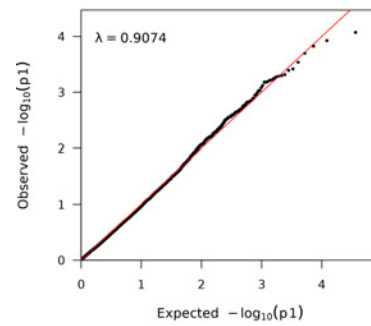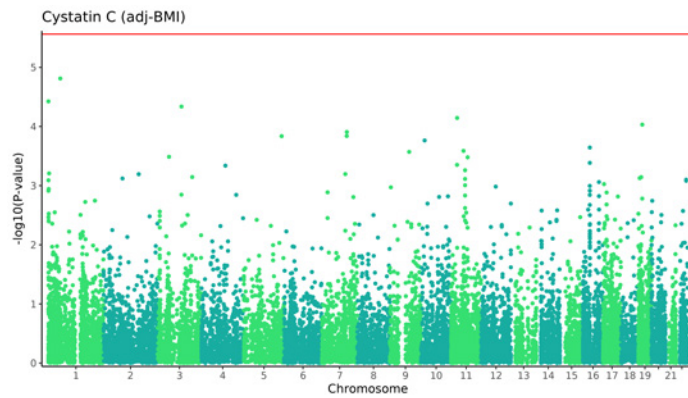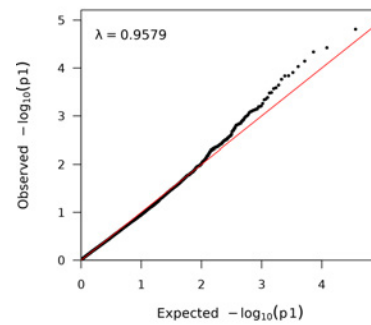



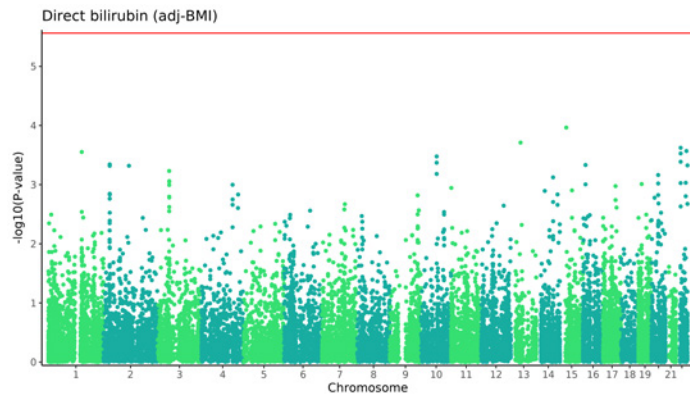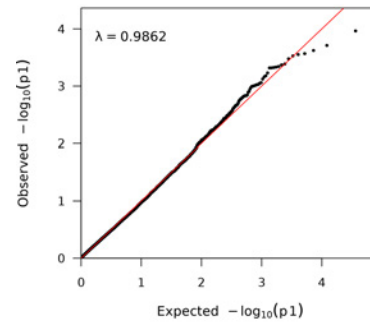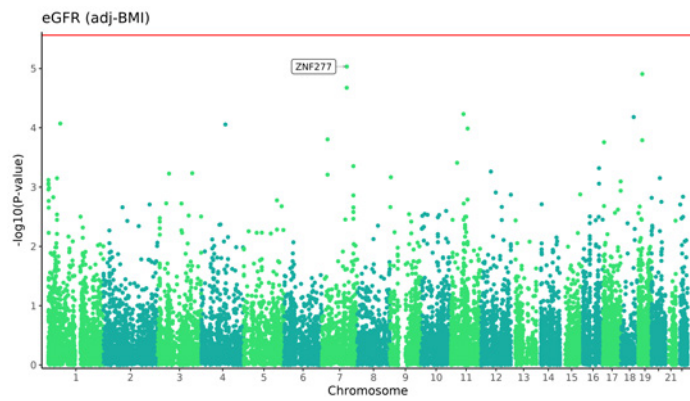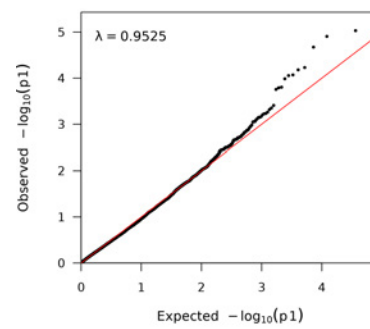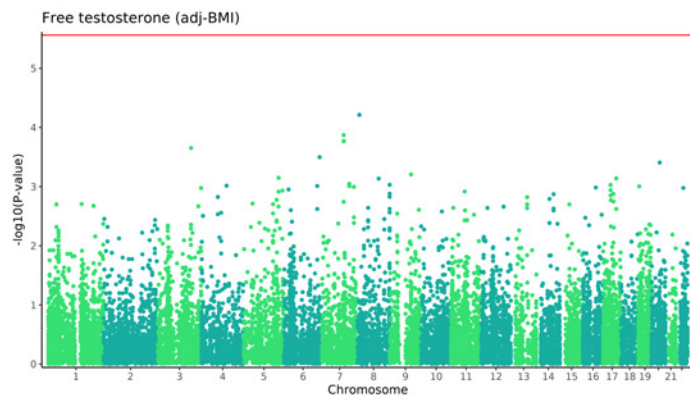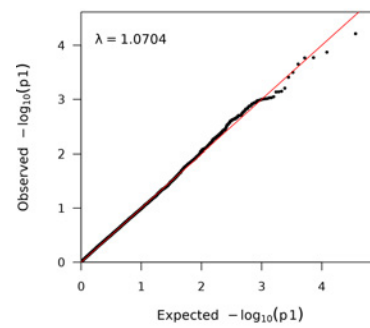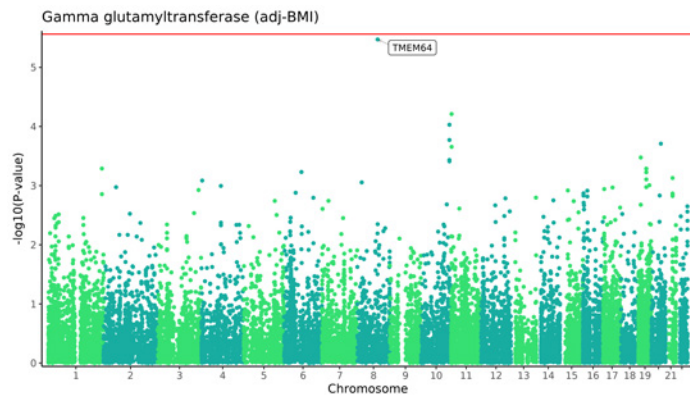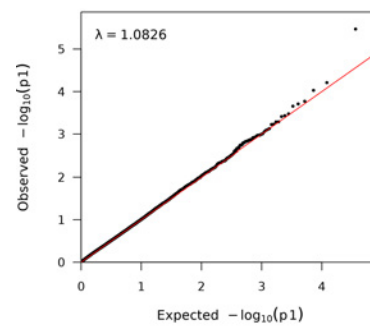

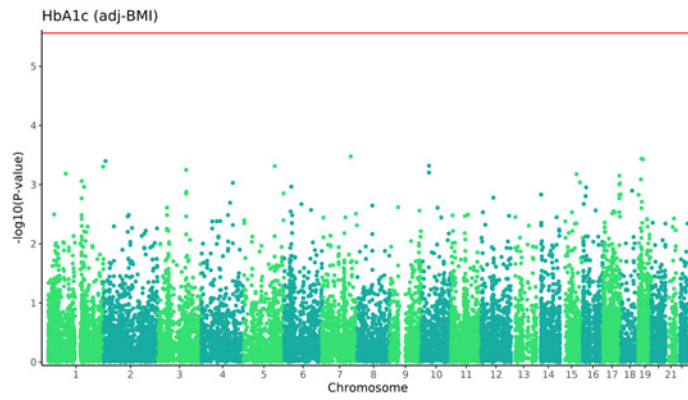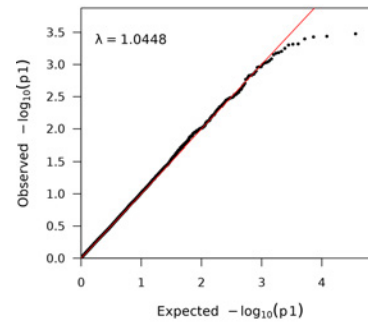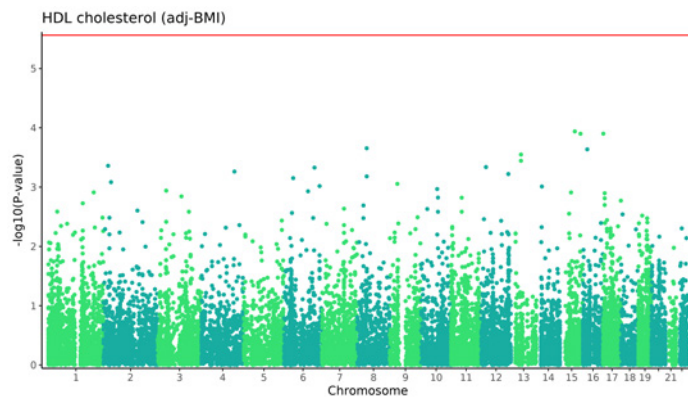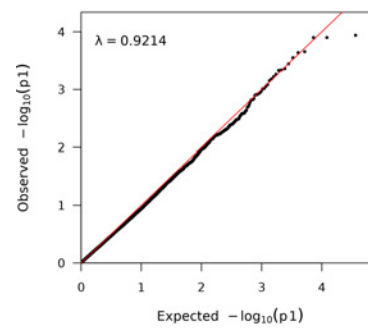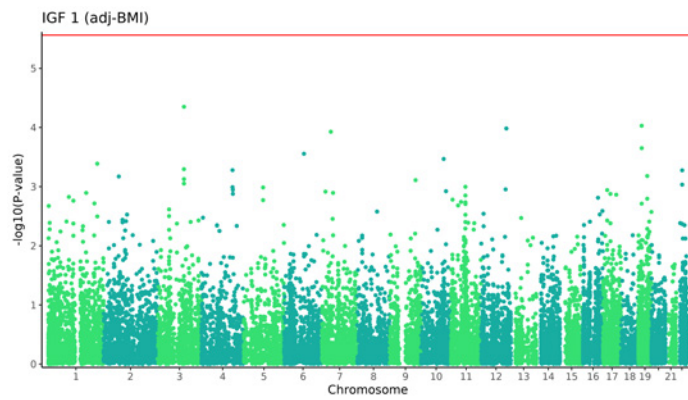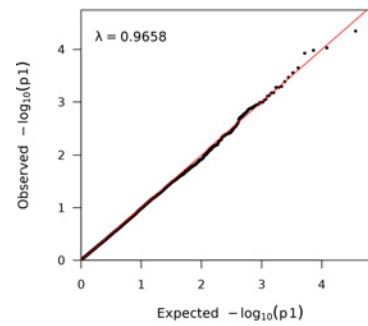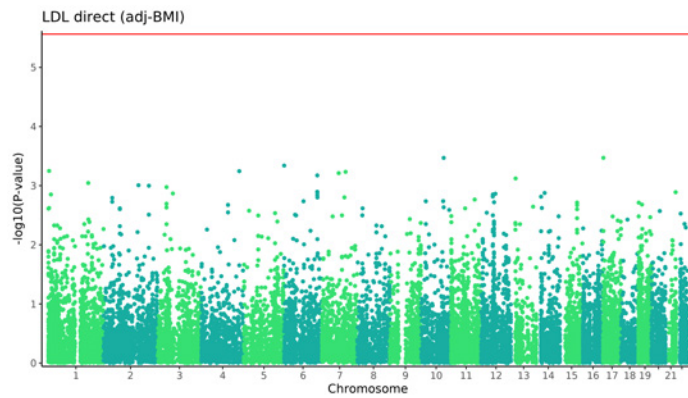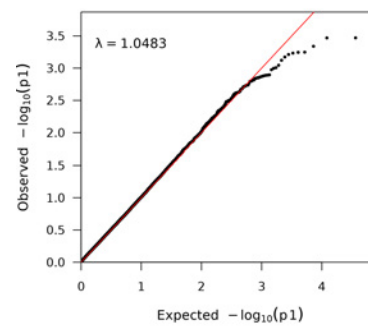

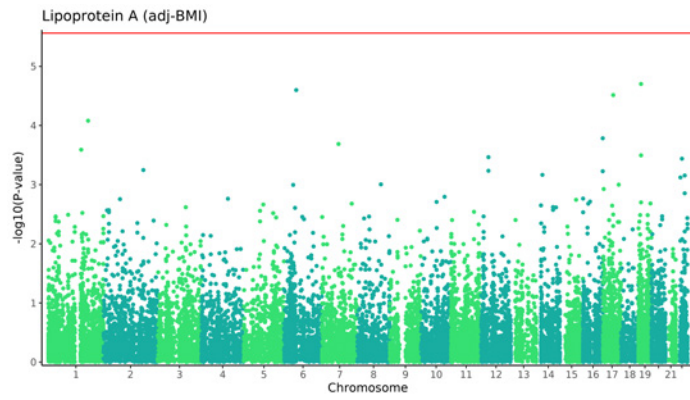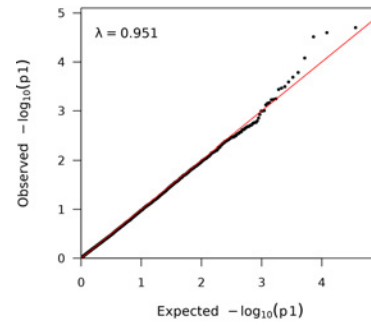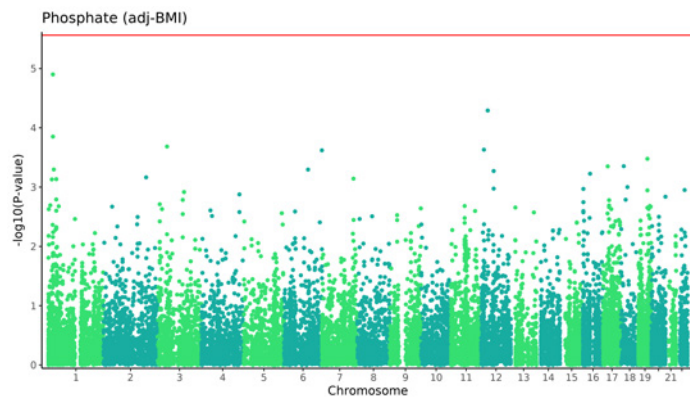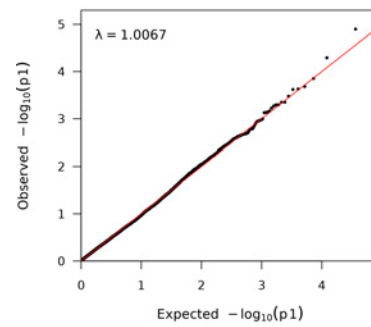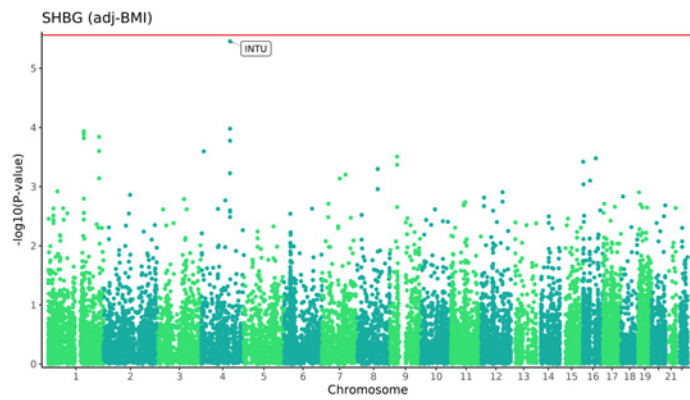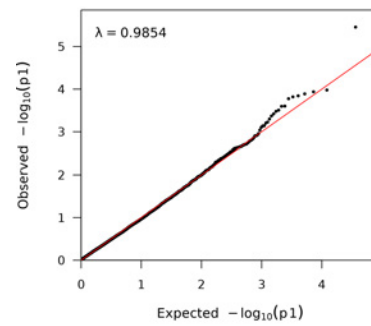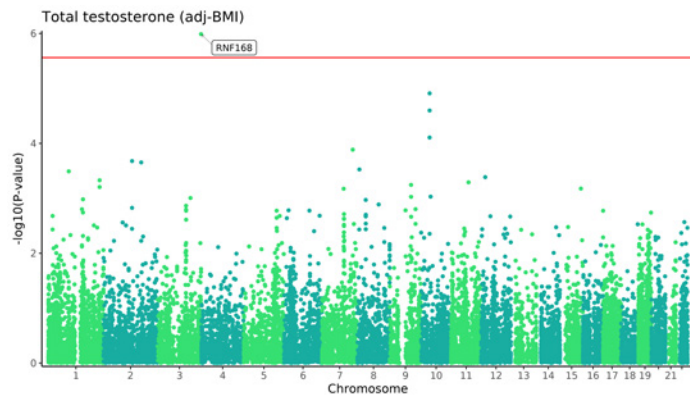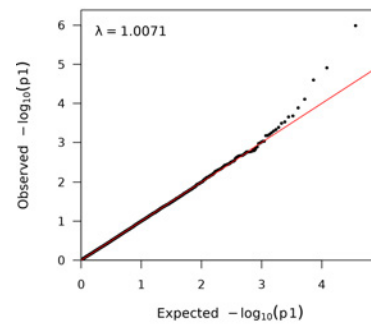



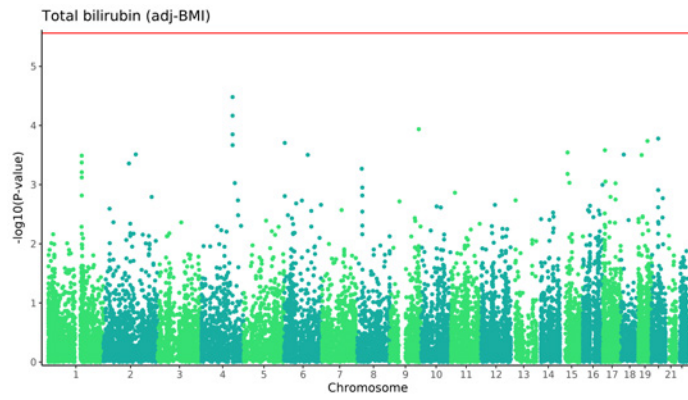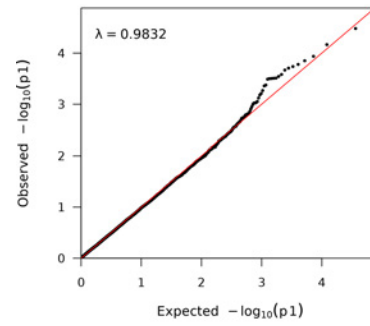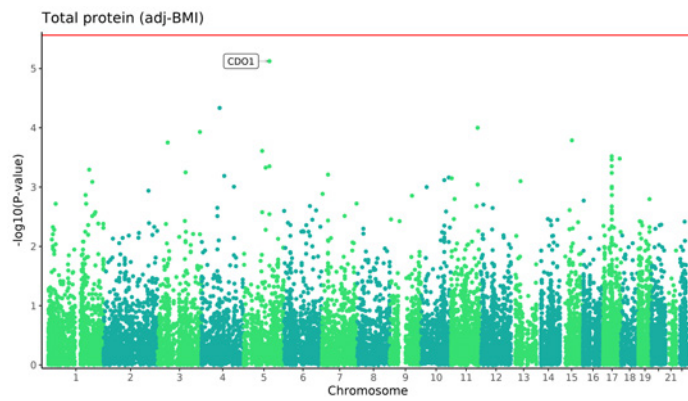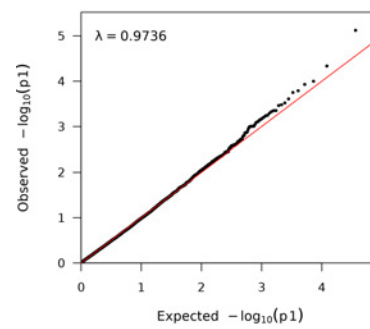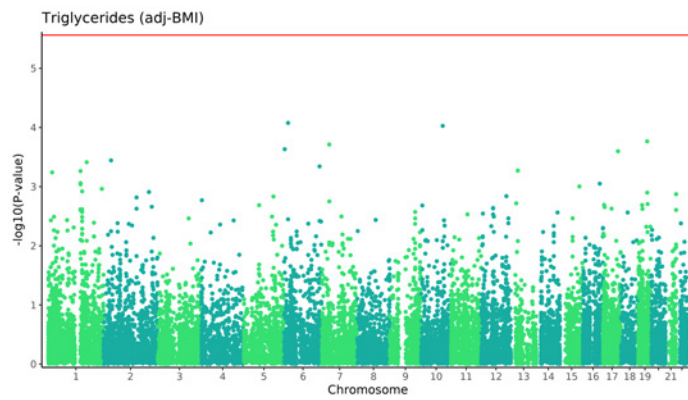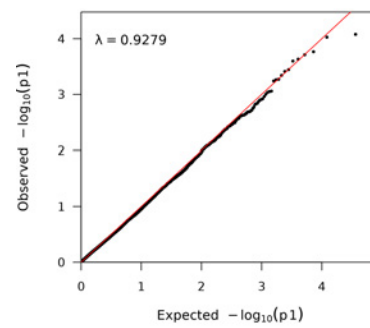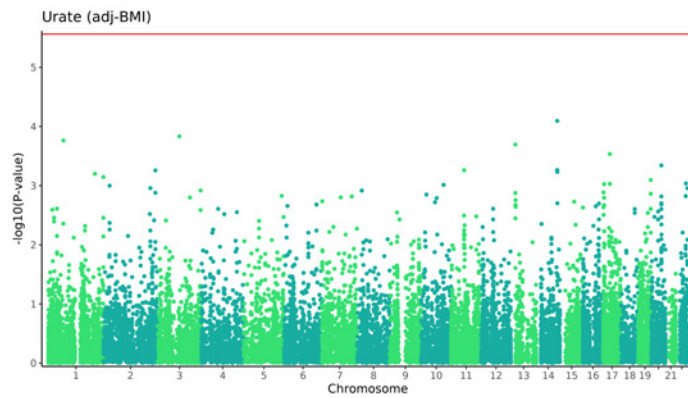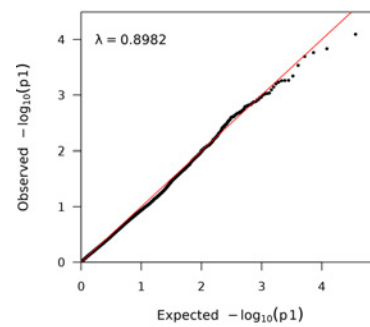

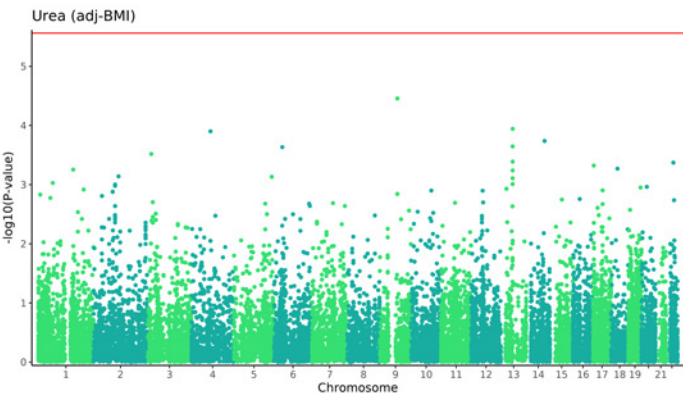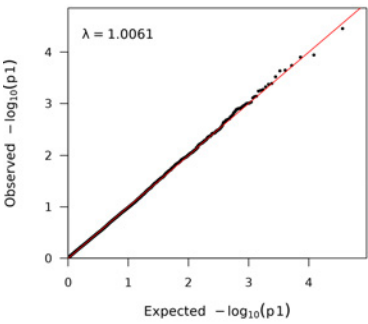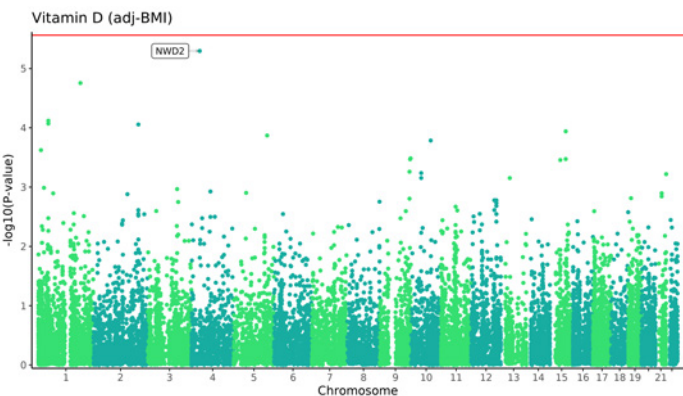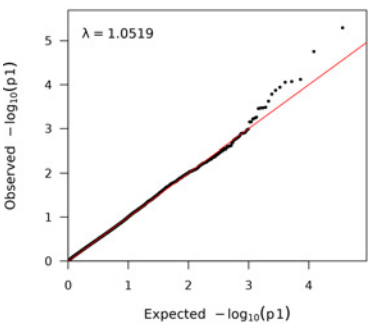

S10

Fish eating frequency of those who, on the same survey,

Answered 0 to:

"How old were you when you last ate any kind of meat?

(Enter "0" if you have never eaten meat in your lifetime)"

N=1230

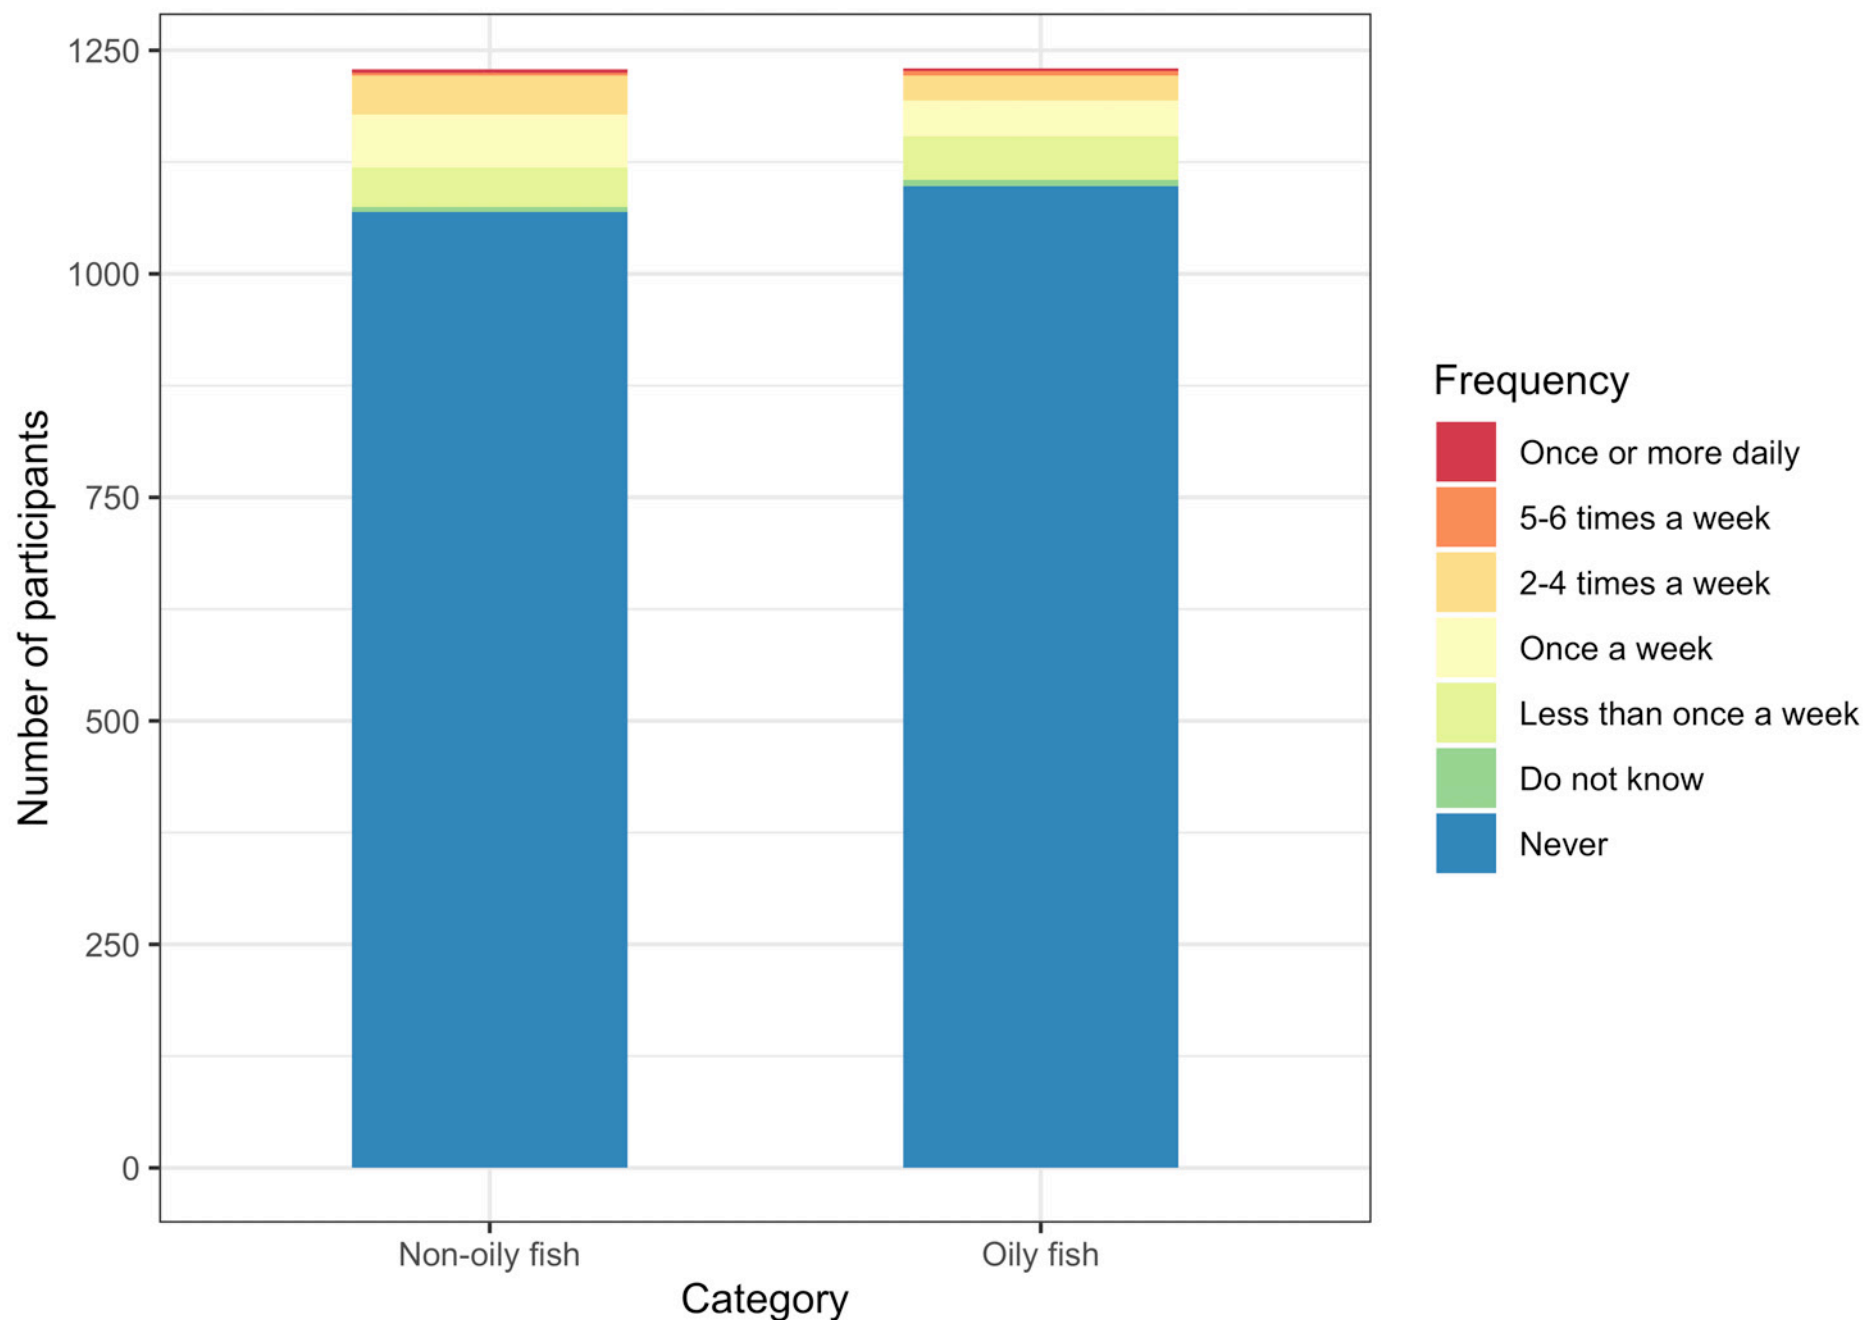

Supplement: Supplementary file [file media-1.zip]
